# Supplementary material
Source: publisher figshare collection journal article supplement (https://gsapubs.figshare.com/ndownloader/files/38162982)
Supplement: Supplementary file 1 [file 38162982]

## Sheet: igneous
Element	Si29	Ti49	Zr91	La139	Ce140	Pr141	Nd146	Sm147	Eu153	Gd157	Tb159	Dy163	Ho165	Er167	Yb172	Lu175	Hf178	Hg202	Hg201	Pb204	Pb206	Pb207	Pb208	Th232	U238	Th/U	Pm147	Hg204	Po208	U232	Pu238		Eu/Eu*	total REE	Gd/Yb	La/Lu	La/Gd	ƩLREE	ƩHREE			Smith, T.M., Saylor, J.E., Lapen, T.J., Hatfield, K., and Sundell, K.E., 2022, Identifying sources of non-unique detrital age distributions through integrated provenance analysis: An example from the Paleozoic Central Colorado Trough: Geosphere, v. 18, https://doi.org/10.1130/GES02541.1
BFB1.2-11r	0.935	0.166	945916	2.82	254.25	12.83	38.12	244.08	113.86	780.86	1386.47	2533.79	3769.68	5374.41	12565	10844.6	544102	0	<****	0	29.28	1.86	2.93	7553.65	34119.6	0.221388	<****	0	<****	<****	<****		0.260807	37920.8	0.0621458	0.000260037	0.0036114	552.1	37368.7
BFB1.2-1r	0.935	0.226	864594	4.72	274.48	8.85	30.45	226.26	122.05	709.58	1427.67	2505.74	3467.06	5110.18	11475.9	9926.8	500591	0	<****	0	29.99	1.86	3.24	8087.28	35622.1	0.22703	<****	0	<****	<****	<****		0.304602	35289.8	0.0618321	0.000475481	0.00665182	544.76	34745
BFB1.2-1c	0.935	0.32	898121	0	273.31	34.5	147.98	617.66	304.25	1818.75	2902.93	5110.73	6971.72	9554.38	19224.2	16848.5	511305	0	<****	0	36.6	2.28	4.81	12235	42140.6	0.290336	<****	0	<****	<****	<****		0.287058	63808.9	0.0946075	0	0	1073.45	62735.5
BFB1.2-2	0.935	0.94	871294	1.07	305.29	9.18	44.5	287.25	109.95	759.01	1446.45	2763.17	3818.78	5370.15	12160.1	10753.4	551232	0	<****	0	39.65	2.7	3.91	10336.3	47649.5	0.216924	<****	0	<****	<****	<****		0.235473	37828.2	0.0624182	9.95039e-05	0.00140973	647.29	37180.9
BFB1.2-3	0.935	0.34	869307	5.47	357.32	112.64	316.43	1231.13	491.26	2670.35	4452.49	7395.9	9851.63	12979	25304.1	22026.6	495310	0	<****	0	55.71	3.6	7.98	20769.2	65911.2	0.31511	<****	0	<****	<****	<****		0.270941	87194.3	0.10553	0.000248336	0.00204842	2022.99	85171.3
BFB1.2-4	0.935	0.233	865086	0	263.77	8.04	41.4	249.79	128.11	824.39	1547.53	2828.13	4279.74	5814.62	13156.6	11383.5	534149	0	<****	0	33.08	2.14	3.6	9131.83	38551.2	0.236876	<****	0	<****	<****	<****		0.282312	40525.7	0.0626596	0	0	563	39962.7
BFB1.2-5	0.935	0.33	864283	1.87	280.15	13.35	59.95	260.47	138.95	848.01	1611.47	2793.65	3952.57	5520.13	12764.9	11349.6	512372	0	<****	0	36.76	2.44	3.97	10045.4	43327.3	0.231848	<****	0	<****	<****	<****		0.295651	39595	0.0664331	0.000164764	0.00220516	615.79	38979.2
BFB1.2-6	0.935	0.25	881977	0	284.64	11.81	49.79	320.39	116.28	932.08	1836.11	3364.03	5076.6	7343.73	16701.4	14325.4	585438	0	<****	0	70.5	4.69	6.03	15290.3	82609.6	0.185091	<****	0	<****	<****	<****		0.212784	50362.3	0.0558084	0	0	666.63	49695.6
BFB1.2-7	0.935	0.27	896514	0	319.94	18.02	93.44	592.96	213.31	1807.1	3211.28	5711.48	8114.44	10853.6	22559.9	19407.5	565600	0	<****	0	56.33	3.49	7.15	18498	66787.6	0.276968	<****	0	<****	<****	<****		0.206067	72903	0.0801022	0	0	1024.36	71878.6
BFB1.2-8	0.935	0.33	852175	2.06	292.04	38.47	113.18	542.67	216.09	1470.21	2592.19	4490.55	6721.29	9248.24	20803.9	18980.4	463925	0	<****	0	57.79	3.77	5.97	15014.2	68664.2	0.218661	<****	0	<****	<****	<****		0.241923	65511.3	0.0706701	0.000108533	0.00140116	988.42	64522.8
BFB1.2-9	0.935	0.33	902930	0	259.75	12.65	30.64	272.36	161.82	798.32	1530.46	2962.26	4050.11	5909.99	12722.3	11541.9	517321	0	<****	0	29.27	1.96	3.39	8535.4	34455.5	0.247722	<****	0	<****	<****	<****		0.347034	40252.5	0.0627497	0	0	575.4	39677.1
BFB1.2-9	0.935	0.38	899811	3.89	307.01	52.91	193.12	959.5	420.03	2338.51	3852.66	6732.66	9114.21	12104	23985.8	21038.4	502915	0	<****	0	42.72	2.63	6.39	16604.3	51672	0.32134	<****	0	<****	<****	<****		0.280407	81102.6	0.0974956	0.0001849	0.00166345	1516.43	79586.2
BFB1.2-10	0.935	0.38	907477	3.58	356.26	76.27	300.41	1111.47	465.02	2556.22	4190.13	6967.79	9278.7	12042.2	24466.4	20355.1	480414	0	<****	0	44.91	3.01	7.09	17775.2	52750.9	0.336965	<****	0	<****	<****	<****		0.275882	82169.6	0.104479	0.000175877	0.00140051	1847.99	80321.6
BFB1.2-11c	0.935	0.38	949060	6.48	363.92	122.67	345.54	1360.82	505.62	2942.57	4950.38	8199.37	11238.8	14989.8	28482.2	24617.7	478546	0	<****	5.16	58.31	3.7	8.51	22686.2	67340.9	0.336886	<****	0	<****	<****	<****		0.252674	98126	0.103312	0.000263225	0.00220216	2199.43	95926.6
BFB1.2-12	0.935	0.44	924632	4.25	355.25	109.69	305.03	1218.05	484.17	2979.02	4713.68	8189.36	10907.7	14472.8	28355.8	24548.2	478137	0	<****	0	58.78	3.81	8.98	22996	68562.8	0.335401	<****	0	<****	<****	<****		0.254173	96643	0.105058	0.000173129	0.00142664	1992.27	94650.7
BFB1.2-13	0.935	0.35	946650	5.17	327.14	43.72	166.9	872.3	332.37	2179.57	3608.37	6054.17	7925.78	10665.4	21737.7	18828.9	537983	0	<****	5.94	43.94	2.94	6.48	16642.3	52091.6	0.319482	<****	0	<****	<****	<****		0.241048	72747.5	0.100267	0.000274577	0.00237203	1415.23	71332.3
BFB1.2-14	0.935	0.27	949814	2.79	388.96	79.38	282.67	1218.72	452	2765.57	4604.52	7471.73	10040.7	12856.3	26011.3	21855.7	541622	0	<****	0	55.42	3.72	8.48	22110.8	65868.9	0.335679	<****	0	<****	<****	<****		0.246203	88030.4	0.106322	0.000127655	0.00100883	1972.52	86057.8
BFB1.2-15	0.935	0.221	967287	3.54	281.22	11.68	50.84	306.03	143.88	988.65	1950.67	3338.69	4631.83	6497.63	14232.1	12314.6	555306	0	<****	0	36.8	2.39	4.16	10817.8	43721.6	0.247426	<****	0	<****	<****	<****		0.261576	44751.4	0.0694662	0.000287463	0.00358064	653.31	44098.1
BFB1.2-16	0.935	0.224	936157	0	364.43	59.76	224.41	955.52	331.13	2364.89	3856.16	6370.85	8801.61	11692	23568	19775.6	578175	0	<****	0	59.4	3.79	7.98	20900.5	70594.7	0.296064	<****	0	<****	<****	<****		0.220279	78364.3	0.100343	0	0	1604.12	76760.2
BFB1_1	0.935	0.015	66865.4	0.134	23.86	0.88	3.06	19.63	8.32	58.95	107.64	187.74	270.38	392.59	866.05	772.56	35451.2	0	0	0	3.16	0.458	0.617	625.7	3237.24	0.193282	<****	0	<****	<****	<****		0.24458	2711.79	0.0680677	0.000173449	0.00227311	47.564	2664.23
BFB1_10	0.935	0.027	66126.5	15.53	44.42	18.7	23.6	57.18	20.47	140.47	207.84	349.89	501.73	627.26	1437.68	1100.22	33392.7	0	0	0	3.49	0.336	0.601	913.69	4165.66	0.219339	<****	0	<****	<****	<****		0.228404	4544.99	0.097706	0.0141154	0.110557	159.43	4385.56
BFB1_11	0.935	0.0208	64300.2	1.475	30.41	5.44	13.15	61.55	24.21	162.64	238.53	404.72	545.82	795.49	1515.23	1279	34605.4	0	0	0	4.86	0.486	0.934	1462.23	5447.97	0.268399	<****	0	<****	<****	<****		0.241973	5077.67	0.107337	0.00115324	0.00906911	112.025	4965.64
BFB1_12	0.935	0.0201	61281.2	0.19	28.24	6.88	18.46	79.8	32.52	194.52	295.34	462.8	602.62	817.06	1580.67	1351.02	31554.9	0	0	0	3.97	0.369	0.726	1148.92	4619.97	0.248686	<****	0	<****	<****	<****		0.261016	5470.12	0.123062	0.000140634	0.000976763	133.57	5336.55
BFB1_13	0.935	0.0221	63418	0.218	33.73	2.05	5.12	30.58	10.87	91.46	153.82	279.44	416.31	599.75	1332.69	1087.48	37255.7	0	0	0	8.17	0.643	0.959	1649.9	9637.7	0.171192	<****	0	<****	<****	<****		0.205539	4043.52	0.0686281	0.000200463	0.00238356	71.698	3971.82
BFB1_14	0.935	0.0289	61676.7	0.67	24.35	5.05	14.01	57.42	25.8	146.85	217.75	360.06	526.13	699.77	1391.23	1090.77	29193.6	0	0	0	3.99	0.418	0.678	979.9	4615.12	0.212324	<****	0	<****	<****	<****		0.280964	4559.86	0.105554	0.000614245	0.00456248	101.5	4458.36
BFB1_16	0.935	0.0237	62657.2	30.71	54.13	29.53	32.28	47.61	18.42	116.66	186.98	305.3	414.82	602.18	1277.18	1025.9	29980	0	0	0.98	4.77	0.966	1.293	1108.59	5042.83	0.219835	<****	0	<****	<****	<****		0.247161	4141.7	0.0913419	0.0299347	0.263244	194.26	3947.44
BFB1_17	0.935	0.0267	65225.3	0.69	26.35	4.06	11.06	53.56	20.99	144.19	221.7	372.86	516.41	699.12	1363.75	1253.72	34607.7	0	0	1.39	4.33	0.867	1.189	1111.05	4054.05	0.274059	<****	0	<****	<****	<****		0.23885	4688.46	0.105731	0.000550362	0.00478535	95.72	4592.74
BFB1_19	0.935	0.0234	59686.2	0.532	29.04	7.43	21.97	82.07	29.72	205.18	318.6	535.15	696.5	937.29	1896.36	1539.78	28878.6	0	0	0	4.81	0.376	0.815	1384.81	5622.47	0.246299	<****	0	<****	<****	<****		0.229028	6299.62	0.108197	0.000345504	0.00259285	141.042	6158.58
BFB1_2	0.935	0.0078	64822.2	0.0613	30.6	1.164	3.87	22.37	8.25	73.11	130.39	237.38	367.28	535.15	1210.42	1047.44	42013.2	0	0	0.54	7.98	1.036	1.255	1365.21	8628.5	0.158221	<****	0	<****	<****	<****		0.204001	3667.49	0.0604005	5.85236e-05	0.000838463	58.0653	3609.42
BFB1_20	0.935	0.0311	62345.8	0	18.43	1.037	3.84	19.47	10.25	63.52	115.28	183.32	258.24	366	863.99	693.27	26788.1	0	0	0	2.41	0.183	0.293	501.83	2867.19	0.175025	<****	0	<****	<****	<****		0.291464	2596.65	0.0735194	0	0	42.777	2553.87
BFB1_22	0.935	0.042	61023.1	0.809	27.18	3.05	9.75	40.36	18.32	123.05	198.02	353.04	469.04	650.19	1405.17	1184.02	29104.6	0	0	0	4.27	0.337	0.652	1151.5	5034.81	0.228708	<****	0	<****	<****	<****		0.259962	4482	0.0875695	0.000683265	0.00657456	81.149	4400.85
BFB1_24	0.935	0.0274	63945.9	0.062	22.12	1.87	6.8	30.05	12.82	96.7	160.63	268.76	397.12	615.14	1264.48	1202.49	32564.8	0	0	0	3.89	0.341	0.454	757.98	4488.13	0.168885	<****	0	<****	<****	<****		0.237822	4079.04	0.0764741	5.15597e-05	0.000641158	60.902	4018.14
BFB1_25	0.935	0.0289	65092.3	0.125	20.15	1.503	5.35	26.53	13.47	82.62	139.4	244.09	343.55	457.42	981.86	902.57	32763.4	0	0	0	2.69	0.319	0.457	645.21	3048.12	0.211675	<****	0	<****	<****	<****		0.287711	3218.64	0.0841464	0.000138493	0.00151295	53.658	3164.98
BFB1_26	0.935	0.0245	67643.8	0.0386	24.22	1.5	4.83	22.23	10.05	75.3	121.26	217.24	328.77	474.31	998.45	876.38	35553.6	0	0	0	3.48	0.338	0.49	783.02	4000.74	0.195719	<****	0	<****	<****	<****		0.24564	3154.58	0.0754169	4.40448e-05	0.000512616	52.8186	3101.76
BFB1_27	0.935	0.0335	61835.2	0.0594	23.75	1.79	5.57	31.38	12.39	91.44	140.62	244.7	385.06	546.21	1221.29	1139.51	33550.9	0	0	0	4.54	0.369	0.537	920.84	5307.55	0.173496	<****	0	<****	<****	<****		0.231301	3843.77	0.0748717	5.21277e-05	0.000649606	62.5494	3781.22
BFB1_28	0.935	0.0235	66040.5	0.069	23.06	1.62	5.02	26.52	11.84	87.03	146.32	241	343.93	498.87	1022.62	930.73	34610.4	0	0	0	3.16	0.303	0.479	762.74	3632.17	0.209996	<****	0	<****	<****	<****		0.246451	3338.63	0.0851049	7.41354e-05	0.00079283	56.289	3282.34
BFB1_29	0.935	0.0265	64221.3	49.66	59.64	36.54	37.03	52.48	19.08	104	164.58	271.08	388.74	523.1	1155.8	1059.51	32165.9	0	0	0	3.05	0.267	0.439	763.16	3545.94	0.215221	<****	0	<****	<****	<****		0.258265	3921.24	0.089981	0.0468707	0.4775	235.35	3685.89
BFB1_3	0.935	0.0349	68572.8	0.0528	22.95	1.017	3.79	25.5	10.04	73.43	115.76	201.61	307.61	423.15	946.37	857.69	35967.3	0	0	0	3.48	0.578	0.731	693.9	3437.62	0.201855	<****	0	<****	<****	<****		0.232021	2988.97	0.0775912	6.15607e-05	0.000719052	53.3098	2935.66
BFB1_30	0.935	0.031	55535.5	0.148	21.08	1.87	5.14	28.45	12.55	81.42	129.43	238.97	323.28	450.67	1056.22	930.65	30105.7	0	0	0	2.77	0.267	0.375	594.02	3302.53	0.179868	<****	0	<****	<****	<****		0.260758	3279.88	0.0770862	0.000159029	0.00181774	56.688	3223.19
BFB1_31	0.935	0.0357	61443.7	1.692	28.38	4.79	11.23	45.68	20.89	130.05	210.14	364.01	518.95	730.06	1491.71	1264.72	32964.8	0	0	0	4.42	0.424	0.735	1231.9	5304.83	0.232222	<****	0	<****	<****	<****		0.271032	4822.3	0.0871818	0.00133785	0.0130104	91.772	4730.53
BFB1_32	0.935	0.0319	61458	0.086	23.38	1.94	6.3	29.52	14.55	93.25	151.48	248.36	371.81	502.84	1077.22	919.42	32682.7	0	0	0	3.16	0.326	0.538	803.36	3735.01	0.215089	<****	0	<****	<****	<****		0.277319	3440.16	0.0865654	9.35372e-05	0.000922252	61.226	3378.93
BFB1_33	0.935	0.0195	57504.5	0.103	21.16	1.549	5.42	27.75	11.64	80.41	130.65	218.63	321.28	462.07	1011.73	846.4	30701.1	0	0	0	3.06	0.284	0.433	703.66	3608.55	0.194998	<****	0	<****	<****	<****		0.246415	3138.79	0.0794777	0.000121692	0.00128094	55.982	3082.81
BFB1_35	0.935	0.0254	60944.8	0.24	31.7	6.36	20.05	86.56	33.69	211.41	328.71	523.99	739.67	932.93	1945.09	1555.34	33493.2	0	0	0	4.66	0.394	0.813	1458.46	5592.54	0.260787	<****	0	<****	<****	<****		0.249046	6415.74	0.108689	0.000154307	0.00113523	144.91	6270.83
BFB1_36	0.935	0.0355	63547.7	0.452	26.78	5.76	14.43	60.68	26.25	167.87	267.54	455.38	623.24	835.79	1707.81	1500.51	32324.5	0	0	0	4.96	0.36	0.729	1370.38	6074.4	0.225599	<****	0	<****	<****	<****		0.260088	5692.49	0.0982955	0.000301231	0.00269256	108.102	5584.39
BFB1_38	0.935	0.0207	58351	0.115	20.47	2.8	9.28	42.65	18.05	119.33	182.91	298.21	445.38	564.29	1253.57	987.2	28508.5	0	0	0	3.05	0.303	0.523	787.11	3772.9	0.208622	<****	0	<****	<****	<****		0.253013	3944.26	0.0951921	0.000116491	0.000963714	75.315	3868.94
BFB1_39	0.935	0.027	57432.7	0.099	23.65	2.46	7.45	33.68	13.44	88.05	160.86	272.78	415.83	604.84	1526.66	1219.2	27174.2	0	0	0	4.94	0.351	0.482	877.48	5840.53	0.15024	<****	0	<****	<****	<****		0.246802	4369	0.0576749	8.12008e-05	0.00112436	67.339	4301.66
BFB1_40	0.935	0.0213	61367.9	0.291	26.81	4.09	11.55	47.81	22.28	129.38	203.7	369.9	470.58	685.23	1395.4	1174.43	30192.2	0	0	0	3.87	0.431	0.634	1006.18	4627.55	0.217433	<****	0	<****	<****	<****		0.283284	4541.45	0.0927189	0.00024778	0.00224919	90.551	4450.9
BFB1_41	0.935	0.0259	58290.5	0.069	20.32	1.019	3.83	21.14	9.87	73.51	114.68	211.06	287.02	434.92	915.14	771.54	31794.7	0	0	0	2.39	0.252	0.364	513.2	2852.39	0.179919	<****	0	<****	<****	<****		0.250375	2864.12	0.0803265	8.94315e-05	0.000938648	46.378	2817.74
BFB1_42	0.935	0.0316	58928.1	0.259	26.21	2.81	7.74	35.01	14.12	100.28	167.09	286.3	428.82	606.18	1349.47	1165.68	29649	0	0	0	5.08	0.436	0.786	1386.73	6176.4	0.224521	<****	0	<****	<****	<****		0.238304	4189.97	0.0743107	0.000222188	0.00258277	72.029	4117.94
BFB1_43	0.935	0.0285	58156.1	43.34	88.67	52.61	63.97	98.65	36.53	199.89	302.89	501.9	694.42	930.24	2006.83	1749.69	30509.4	0	0	0	5.7	0.521	1.034	1745.93	6857.67	0.254595	<****	0	<****	<****	<****		0.260139	6769.63	0.0996048	0.0247701	0.216819	347.24	6422.39
BFB1_44	0.935	0.0284	64339.1	617.88	528.44	530.75	447.22	274.11	61.21	234.24	258.49	396.5	533.93	662.87	1461.52	1339.62	30398.6	0	0	0	5.21	0.448	0.79	1342.2	6253.43	0.214634	<****	0	<****	<****	<****		0.241562	7346.78	0.160271	0.461235	2.63781	2398.4	4948.38
BFB1_46	0.935	0.023	56509.9	0	20.04	1.234	3.71	22.28	10.51	73.21	119.59	219.15	310.35	409.84	955.04	759.73	30850.8	0	0	0	2.54	0.229	0.392	596.11	3087.86	0.19305	<****	0	<****	<****	<****		0.260232	2904.68	0.0766565	0	0	47.264	2857.42
BFB1_47	0.935	0.0344	58831	34.55	56.34	31.31	35.27	88.03	33.64	203.18	307.89	532.4	676.97	930.36	1932.08	1611.67	29545.4	0	0	0	4.97	0.448	0.952	1654.83	6095.19	0.271498	<****	0	<****	<****	<****		0.251536	6473.69	0.105161	0.0214374	0.170046	245.5	6228.19
BFB1_48	0.935	0.0271	60281.3	0.336	27.06	5.72	15.04	63.77	27.93	159.02	248.78	412.31	554.4	767.41	1564.48	1270.44	31875.1	0	0	0	3.71	0.396	0.697	1062.95	4403.31	0.241398	<****	0	<****	<****	<****		0.277356	5116.7	0.101644	0.000264475	0.00211294	111.926	5004.77
BFB1_49	0.935	0.023	58289.5	0.07	25.01	1.355	4.29	23.41	10.73	73.05	125.69	220.9	296.44	434.26	1001.83	805.94	30520.8	0	0	0	3.35	0.316	0.522	822.85	4109.87	0.200213	<****	0	<****	<****	<****		0.259471	3022.97	0.0729166	8.68551e-05	0.000958248	54.135	2968.84
BFB1_5	0.935	0.0437	65013	79.82	73.91	70.27	61.52	91.19	29.51	192	286.94	448.37	650.39	819.59	1712.18	1478.42	31809.9	0	0	0.64	4.94	0.876	1.273	1296.34	4987.47	0.259919	<****	0	<****	<****	<****		0.223021	5994.11	0.112138	0.0539901	0.415729	376.71	5617.4
BFB1_50	0.935	0.0378	55006.8	0.438	26.58	6.39	15.62	69.71	29.66	189.37	297.1	507.13	652.4	894	1794.49	1541.04	27029.1	0	0	0	5.04	0.429	0.809	1429.67	6154.48	0.232297	<****	0	<****	<****	<****		0.258148	6023.93	0.105529	0.000284224	0.00231293	118.738	5905.19
BFB1_6	0.935	0.0111	64782.7	0.378	35.06	3.67	11.6	63.11	23.43	177.4	295.2	514.83	718.12	1012.65	2006.9	1650.55	40593.8	0	0	0	9.08	0.701	1.298	2370.47	10421.6	0.227457	<****	0	<****	<****	<****		0.221435	6512.9	0.088395	0.000229015	0.00213078	113.818	6399.08
BFB1_9	0.935	0.0362	65620.3	0.236	24.99	4.67	12.78	55.15	21.66	155.76	231.89	379.37	532.44	744.61	1486.46	1275.79	31280.9	0	0	0	4.27	0.378	0.68	1104.23	4949.58	0.223096	<****	0	<****	<****	<****		0.233699	4925.81	0.104786	0.000184983	0.00151515	97.826	4827.98
BFB1-median	0.935	0.0316	64782.7	0.336	30.6	6.36	15.62	61.55	25.8	162.64	248.78	404.72	545.82	767.41	1526.66	1279	33493.2	0	0	0	4.94	0.448	0.813	1365.21	5622.47	0.242813	#NUM!	0	#NUM!	#NUM!	#NUM!		0.257865	5075.3	0.106533	0.000262705	0.00206591	114.466	4960.83
mean	0.935	0.124114	313351	16.1729	124.966	29.6365	66.1093	253.89	102.004	633.446	1065.96	1826.06	2516.18	3396.31	7028.42	6073.04	178487	0	0	0.257018	17.327	1.23895	2.33926	5496.09	20374.4	0.234183	#DIV/0!	0	#DIV/0!	#DIV/0!	#DIV/0!		0.254354	23132.2	0.0901264	0.00266308	0.0255317	490.775	22641.4
std	5.60046e-16	0.173867	389514	82.3908	144.273	74.0733	105.354	382.266	150.52	903.556	1506.43	2550.84	3466.58	4607.69	9292.12	8032.34	227426	0	0	1.04998	21.1677	1.31407	2.7248	7357.82	25005.7	0.0479351	#DIV/0!	0	#DIV/0!	#DIV/0!	#DIV/0!		0.256114	31298.4	0.097239	0.0102574	0.0911851	788.357	30510.1
max	0.935	0.94	967287	617.88	528.44	530.75	447.22	1360.82	505.62	2979.02	4950.38	8199.37	11238.8	14989.8	28482.2	24617.7	585438	0	0	5.94	70.5	4.69	8.98	22996	82609.6	0.336965	0	0	0	0	0		0.251123	99448.1	0.104592	0.025099	0.20741	3485.11	95963
min	0.935	0.0078	55006.8	0	18.43	0.88	3.06	19.47	8.25	58.95	107.64	183.32	258.24	366	863.99	693.27	26788.1	0	0	0	2.39	0.183	0.293	501.83	2852.39	0.15024	0	0	0	0	0		0.243517	2581.5	0.06823	0	0	41.84	2539.66
																																	#DIV/0!	0	#DIV/0!	#DIV/0!	#DIV/0!	0	0
QM1.3-1r	0.935	0	903565	2281.67	2443.63	2120.99	2517.35	2864	394.39	4109.78	5959.96	9383.6	13304.4	18449.2	37952.6	32839.7	701249	0	<****	0	237.31	15.43	20	49028.2	264431	0.18541	<****	0	<****	<****	<****		0.114956	134621	0.108287	0.069479	0.555181	12227.6	122394
QM1.3-2r	0.935	0.66	994500	674.16	958.17	715.39	878.48	1687.8	336.46	3541.73	6353.94	10401	15319.3	21104.7	40941.3	35262.4	762530	0	<****	0	200.64	13.11	15.02	41794.3	233109	0.179291	<****	0	<****	<****	<****		0.137615	138175	0.0865075	0.0191184	0.190348	4914	133261
QM1.3-1c	0.935	0.79	902959	1272.97	1851.52	1998.06	2566.42	6833.96	1338.38	12476.9	19620.5	29421.7	36342.1	44892.8	86174.4	72194.2	653578	0	<****	5.55	311.8	20.81	45.25	151068	405807	0.372267	<****	0	<****	<****	<****		0.144941	316984	0.144786	0.0176326	0.102026	14522.9	302461
QM1.3-2c	0.935	0.04	953117	314.49	431.24	235.17	274.43	705.37	264.75	1831.4	3353.93	6147.79	9072.07	12771	25116.7	21423.3	594240	0	<****	0	129.1	8.34	8.27	19990.2	143123	0.139671	<****	0	<****	<****	<****		0.232936	81941.6	0.0729156	0.0146798	0.171721	1960.7	79980.9
QM1.3-3	0.935	0.029	938698	1930.67	1802.46	1636.21	1658.08	1763.71	203.47	2842.63	4545.7	8190.6	12640.6	17796.1	36571.5	32893	710778	0	<****	0	232.68	14.86	16.15	39479.5	255900	0.154277	<****	0	<****	<****	<****		0.0908713	124475	0.077728	0.0586954	0.679184	8791.13	115684
QM1.3-4	0.935	0.139	956441	159.26	494.35	224.49	367.61	1152.6	250.96	3161.87	5758.7	10419.1	15352	21912.3	45267.4	40263.1	727144	0	<****	5.11	304.34	22.51	27.91	60146.5	329706	0.182425	<****	0	<****	<****	<****		0.13146	144784	0.0698487	0.00395548	0.0503689	2398.31	142386
QM1.3-5	0.935	0.125	946593	147.41	581.19	110.15	188.13	798.64	178.78	3057.1	6168	11892.5	17878.6	25593.8	52740.3	45231.1	707849	0	<****	0	442.23	28.33	39.46	102955	502235	0.204993	<****	0	<****	<****	<****		0.114416	164566	0.0579652	0.00325904	0.0482189	1825.52	162740
QM12_1	0.935	0	86728.2	0.253	29.98	3.06	9.07	63.06	19.86	229.92	396.76	691.42	1145.01	1641.96	2689.49	2629.56	49479.2	0	0	0	21.26	1.36	1.85	3638.31	21582.7	0.168575	<****	0	<****	<****	<****		0.164935	9549.4	0.0854883	9.62138e-05	0.00110038	105.423	9443.98
QM12_11	0.935	0.0072	96679.8	0.966	33.8	1.359	3.55	27.36	6.62	134.75	270.7	461.15	810.47	1173.79	2269.13	2099.91	65037.8	0	0	1.41	26	2.31	2.45	3452.4	26900.2	0.128341	<****	0	<****	<****	<****		0.109027	7293.56	0.059384	0.00046002	0.00716883	67.035	7226.52
QM12_12	0.935	0	100871	33.94	82.3	68.17	87.36	253.35	35.04	515.57	766.37	1058.2	1424.36	1808.35	3185.26	3398.06	79216.9	0	0	0	37.06	2.46	2.72	7257.99	38094.7	0.190525	<****	0	<****	<****	<****		0.0969527	12716.3	0.161861	0.00998805	0.0658301	525.12	12191.2
QM12_13	0.935	0	94902.4	5.19	46.13	8.64	13.49	66.6	18.21	257.33	440.61	817.85	1302.6	1750.89	3293.23	3059.02	58333.4	0	0	0	28.43	2.1	2.88	5278.92	28926.4	0.182495	<****	0	<****	<****	<****		0.1391	11079.8	0.0781391	0.00169662	0.0201687	140.05	10939.7
QM12_14	0.935	0	91319.5	22.22	44.77	24.74	33.2	94.36	36.47	337.53	571.15	919.04	1315.45	1736.22	2713.99	2427.72	43930.4	0	0	0	15.86	1.08	1.2	2320.33	16489	0.14072	<****	0	<****	<****	<****		0.204355	10276.9	0.124367	0.00915262	0.0658312	219.29	10057.6
QM12_15	0.935	0.0159	97608.9	13.65	53.41	14.89	15.19	54.39	11.48	228.92	421.27	772.71	1267.45	1792.78	3239.59	3014.47	65519.3	0	0	0	31.28	2.04	2.52	4991.16	31992.8	0.156009	<****	0	<****	<****	<****		0.102882	10900.2	0.0706633	0.00452816	0.0596278	151.53	10748.7
QM12_17	0.935	0.0042	97646.8	408.55	373.81	325.21	260.73	260.02	22.79	393.65	659.03	1066.28	1489.74	2152.33	3725.93	3757.96	58227.1	0	0	0	35.9	2.47	3.38	6386.14	36010.5	0.177341	<****	0	<****	<****	<****		0.0712338	14896	0.105651	0.108716	1.03785	1628.32	13267.7
QM12_18	0.935	0.103	94025.1	15069.7	15446	13410.2	10745.5	6923.98	269.03	4180.11	4013.55	4011.87	4425.15	4971.1	5690.89	5050.48	107015	0	0	2.23	32.6	3.19	12.5	27260	31722.9	0.859318	<****	0	<****	<****	<****		0.0500068	94207.5	0.734527	2.98382	3.6051	61595.3	32612.2
QM12_19	0.935	0.0141	100170	5.15	37.52	12.09	14.41	64.03	17.2	254.89	441.4	782.43	1308.91	1676.13	3049.88	3078.5	60666.5	0	0	0	23.64	1.62	1.93	3753.78	24056	0.156044	<****	0	<****	<****	<****		0.134636	10742.5	0.0835738	0.00167289	0.0202048	133.2	10609.3
QM12_2	0.935	0	93654.9	212.2	223.92	208.57	209.79	206.06	23.41	292.2	398.48	646.19	958.09	1288.68	2626.29	2284.82	59335.4	0	0	0.73	26.55	1.71	1.96	3802.45	27478	0.138382	<****	0	<****	<****	<****		0.0954035	9578.7	0.11126	0.0928738	0.726215	1060.54	8518.16
QM12_21	0.935	0.0143	90096.1	1.069	34.49	3.99	9.56	58.94	9.96	206.08	394.15	648.22	1107.06	1598.76	2830.57	2782.33	64111.6	0	0	0.74	27.36	2.36	2.55	3847	27011.7	0.14242	<****	0	<****	<****	<****		0.0903725	9685.18	0.0728051	0.00038421	0.00518731	108.049	9577.13
QM12_22	0.935	214.34	824.72	5209.69	3985.41	2599.38	1441.78	587.86	1928.99	390.9	292.92	310.67	321.86	319	387.92	272.87	635.45	0	0	0	8.67	0.8	8	16623.8	9214.54	1.80408	<****	0	<****	<****	<****		4.02402	18049.2	1.00768	19.0922	13.3274	13824.1	4225.13
QM12_24	0.935	0	92769.7	7.1	51.85	7.5	15.66	72.78	19.29	305.67	553.3	967.17	1458.33	2168.36	3806.99	3716.79	54872.7	0	0	0	33.44	2.1	3.07	6205.85	33648.1	0.184434	<****	0	<****	<****	<****		0.12933	13150.8	0.0802918	0.00191025	0.0232277	154.89	12995.9
QM12_26	0.935	0.22	104876	313.63	331.66	298.76	183.58	160.84	16.43	270.94	427.94	768.23	1207.13	1793.52	3149.9	2960.29	62494.3	0	0	0	39.2	2.8	3.9	6511.58	39273.8	0.1658	<****	0	<****	<****	<****		0.0787053	11882.8	0.0860154	0.105946	1.15756	1288.47	10594.4
QM12_27	0.935	0.023	95606.9	3197.6	3536.29	3019.95	2592.31	2416.72	84.95	2130.37	2581.87	2672.87	3489.19	4152.86	5677.59	4869.44	60629.1	0	0	0.56	35.9	2.53	6.05	12495.1	36029.9	0.346799	<****	0	<****	<****	<****		0.0374389	40422	0.375224	0.656667	1.50096	14762.9	25659.1
QM12_28	0.935	0.0098	105206	15.5	53.46	13.21	14.9	68.76	17.7	264.41	467.89	895.12	1359.4	1946.84	3462.52	3473.14	57507.5	0	0	0	30.17	2.07	2.84	5548.12	30758.3	0.180378	<****	0	<****	<****	<****		0.13127	12052.9	0.0763635	0.00446282	0.0586211	165.83	11887
QM12_29	0.935	0.0199	95835.8	6.31	34.49	8.72	10.44	61.35	12.03	261.9	324.8	629.65	964.57	1285.26	2608.96	2574.34	69896.6	0	0	1.16	35.49	3.61	3.31	3816.69	35288.2	0.108158	<****	0	<****	<****	<****		0.0949053	8782.82	0.100385	0.00245111	0.0240932	121.31	8661.51
QM12_3	0.935	0.0128	87726.3	189.6	212.05	180.85	188.64	233.3	29.84	383.58	579.51	989.2	1497.74	1987.79	3737.12	3236.65	53041.3	0	0	0	28.85	1.86	2.53	5056.96	29609.9	0.170786	<****	0	<****	<****	<****		0.0997501	13445.9	0.102641	0.0585791	0.494291	1004.44	12441.4
QM12_30	0.935	0	96727.8	0.284	34.86	1.717	7.43	75.15	9.18	241.8	450.94	818.76	1216.58	1853.57	3461.85	3011.17	65597.4	0	0	0	28.92	1.94	2.13	4215.2	29758	0.141649	<****	0	<****	<****	<****		0.0681005	11183.3	0.069847	9.43155e-05	0.00117452	119.441	11063.9
QM12_4	0.935	0.0125	99383	0.533	27.56	2.5	5.95	39.52	10.09	187.51	362.69	672.85	1094.08	1630.48	3019.29	2854.82	62221.2	0	0	0	29.12	1.91	1.95	3758	29895.6	0.125704	<****	0	<****	<****	<****		0.117212	9907.87	0.062104	0.000186702	0.00284252	76.063	9831.81
QM12_5	0.935	0.108	99872.8	165.98	181.24	141.51	107.18	187.79	26.99	487.79	1003.08	1469.74	1965.31	2763.14	4315.84	4004.95	61643.6	0	0	0	25.65	1.94	2.43	6103.08	27691.7	0.220394	<****	0	<****	<****	<****		0.0891765	16820.5	0.113023	0.0414437	0.340269	783.7	16036.8
QM12_6	0.935	0.0169	93702.5	1.92	33.44	3.98	11.41	72.01	13.94	281.33	495.63	882.11	1431.36	2057.87	3376.79	3133.22	58538.2	0	0	0	27.63	1.87	2.37	4738.42	27999	0.169236	<****	0	<****	<****	<****		0.0979396	11795	0.0833129	0.000612788	0.00682473	122.76	11672.2
QM12_8	0.935	0	94559.2	51.73	75.59	45.67	44.26	94.62	18.59	325.11	581.28	1046.11	1646.85	2282.53	4037.93	3771.79	58359.9	0	0	0	32.17	2.24	2.9	5664.85	32084.7	0.176559	<****	0	<****	<****	<****		0.105992	14022.1	0.080514	0.013715	0.159115	311.87	13710.2
QM1-10	0.935	0	64129.8	0.759	13.8	1.66	5.7	28.79	20.3	121.54	204.99	357.61	568.39	744.29	1452.85	1234.82	45127.9	0	<****	0.71	8.93	0.655	0.615	992.27	9209.06	0.107749	<****	0	<****	<****	<****		0.343175	4755.5	0.0836563	0.000614664	0.00624486	50.709	4704.79
QM1-14	0.935	0	58358.3	15.57	59.65	16.19	20.86	57.09	12.74	200.28	366.34	677.2	1043.85	1547.84	2886.76	2544.8	47137.6	0	<****	0	36.22	2.4	3.7	6639.14	38330.1	0.17321	<****	0	<****	<****	<****		0.119144	9449.17	0.0693788	0.00611836	0.0777412	169.36	9279.81
QM1-1c	0.935	0.0134	65141.6	2.65	29.87	7.34	12.43	56.28	9.41	205.98	381.56	679.81	997.46	1509.27	3040.58	3037.04	71769.4	0	<****	1.16	29.57	2.52	2.54	4576.86	30674.6	0.149207	<****	0	<****	<****	<****		0.0873977	9969.68	0.0677437	0.00087256	0.0128653	108.57	9861.11
QM1-4	0.935	0	64630.3	3.49	27.18	52.19	142.76	855.09	44.62	2112.88	2380.08	2853.28	3197.96	3404.33	4598.99	4317.87	61335.2	0	<****	0	19.59	1.39	1.76	3312.1	20476.9	0.161748	<****	0	<****	<****	<****		0.033196	23990.7	0.459423	0.000808269	0.00165177	1080.71	22910
QM1-6c	0.935	0.043	66903.1	2.78	32.57	6.74	14.17	76.22	15.06	282.85	510.57	928.59	1411.88	2003.68	3797.92	3564.69	54947.1	0	<****	1.22	33.4	2.96	3.61	5866.15	34721.5	0.168949	<****	0	<****	<****	<****		0.102568	12647.7	0.074475	0.000779871	0.00982853	132.48	12515.2
QM1.3-median	0.935	0.0134	95606.9	15.57	53.46	24.74	33.2	94.36	19.86	292.2	495.63	895.12	1359.4	1853.57	3376.79	3133.22	61335.2	0	0	0	30.17	2.24	2.84	5548.12	30758.3	0.180378	#NUM!	0	#NUM!	#NUM!	#NUM!		0.119604	11647.1	0.0865319	0.00496933	0.0532854	221.33	11425.8
mean	0.935	6.54852	215993	872.206	917.814	748.268	644.726	741.533	151.411	1177.44	1823.81	2895.94	4021.57	5394.17	10242.6	9035.34	153037	0	0	0.623636	66.9397	4.64076	6.86924	16598.5	73990.9	0.243898	#DIV/0!	0	#DIV/0!	#DIV/0!	#DIV/0!		0.16204	38666.8	0.114956	0.0965327	0.740762	3924.55	34742.2
std	4.50975e-16	37.3025	311220	2768.29	2778.45	2400.02	1939.35	1671.05	397.374	2300.76	3592.33	5569.19	7215.35	9357.19	18622	15827.7	226918	0	0	1.33603	101.885	6.74391	10.5858	31468.2	119331	0.309191	#DIV/0!	0	#DIV/0!	#DIV/0!	#DIV/0!		0.202661	74439.1	0.12355	0.174901	1.20321	11557.2	62882
max	0.935	214.34	956441	15069.7	15446	13410.2	10745.5	6923.98	1928.99	12476.9	19620.5	29421.7	36342.1	44892.8	86174.4	72194.2	727144	0	0	5.55	442.23	28.33	45.25	151068	502235	1.80408	0	0	0	0	0		0.207539	364647	0.144786	0.208738	1.20781	61595.3	303052
min	0.935	0	824.72	0.253	13.8	1.359	3.55	27.36	6.62	121.54	204.99	310.67	321.86	319	387.92	272.87	635.45	0	0	0	8.67	0.655	0.615	992.27	9209.06	0.107749	0	0	0	0	0		0.1148	1991.79	0.313312	0.000927181	0.00208162	46.322	1945.47
																																	#DIV/0!	0	#DIV/0!	#DIV/0!	#DIV/0!	0	0
WMG1.3-2r	0.935	0.22	950452	0	150.37	4.32	22.1	231.55	104.51	854.43	1667.68	3262.78	4960.89	7223.09	15663.5	14444.1	635174	0	<****	0	84.5	5.71	5.36	12558	88897.5	0.141263	<****	0	<****	<****	<****		0.234962	48589.4	0.054549	0	0	408.34	48181
WMG1.3-6r	0.935	1.05	929834	461.66	1191.14	776.83	1273.56	3352.69	1280.97	8310.25	11678	16657.7	19670.8	22524.8	35497.7	29850.5	699451	0	<****	0	275.49	22.04	18.71	37682.6	312720	0.120499	<****	0	<****	<****	<****		0.242681	152527	0.234107	0.0154658	0.0555531	7055.88	145471
WMG1.3-1	0.935	0.47	968131	99.18	291.83	233.73	383.57	1249.51	555.84	2896.08	4988.97	8133.68	11134	14856.2	29462.3	24534	663009	0	<****	0	80.75	5.51	7.23	23620.3	93181.2	0.253488	<****	0	<****	<****	<****		0.292196	98818.9	0.0982979	0.00404256	0.0342463	2257.82	96561
WMG1.3-2c	0.935	0.158	938116	11020.9	3506.86	8009.92	7018.29	5677.58	1535.73	4596.41	6642.24	8710.91	11640	15820.9	32485.6	27860.8	671310	0	<****	0	294.66	21.36	25.47	55551.5	318323	0.174513	<****	0	<****	<****	<****		0.300624	144526	0.141491	0.395571	2.39773	35233.6	109293
WMG1.3-3	0.935	0.34	946374	1.27	253.79	46.94	187.68	866.83	224.76	2998.56	5253.18	9185.78	13889.3	19027.6	40078.1	34606.6	535374	0	<****	0	185.88	12.15	20.57	52538.3	211933	0.247901	<****	0	<****	<****	<****		0.139411	126620	0.074818	3.66982e-05	0.000423537	1356.51	125264
WMG1.3-5	0.935	0.32	938053	208.06	704.52	343.22	589.57	1832.9	529.43	4546.85	7673.8	13196.3	18332.3	25700.7	55570.8	48442.4	663691	0	<****	0	329.46	24.15	34.73	75445.9	361063	0.208955	<****	0	<****	<****	<****		0.183393	177671	0.0818208	0.004295	0.0457592	3678.27	173993
WMG1.3-6c	0.935	0.82	931188	210.2	718.56	429.54	715.06	1938.1	695.53	4460.21	7171.59	11925.8	15813.8	21203	48176.7	43116.2	788978	0	<****	0	496.24	33.23	36.44	81679.2	519858	0.157118	<****	0	<****	<****	<****		0.236565	156574	0.0925803	0.0048752	0.0471278	4011.46	152563
WMG1.3-8	0.935	0.192	977117	1.29	181.49	21.22	91.47	552.29	223.98	1796.1	3392.01	6041.16	8948.25	12756	26026	22719.4	659391	0	<****	0	94.75	6.11	7.31	18042.5	103383	0.174521	<****	0	<****	<****	<****		0.224885	82750.7	0.0690118	5.67796e-05	0.000718223	847.76	81902.9
WMG1.3-9	0.935	0.23	979418	47.66	225.46	55.12	91.68	402.26	169.18	1185.79	2367.13	4236.61	6394.51	9058.23	20414.5	18173.5	686050	0	<****	5.69	65.25	4.4	4.97	11818.1	71380.9	0.165564	<****	0	<****	<****	<****		0.244958	62821.6	0.0580858	0.0026225	0.0401926	822.18	61999.4
WMG1.3-10	0.935	0.8	845536	414.45	736.49	348.06	493.79	1383.42	386.3	3463.32	6125.63	10665.3	15599	22893.6	51276.9	44105.5	664441	0	<****	7.86	337.51	26.89	34.88	68906.3	368613	0.186934	<****	0	<****	<****	<****		0.176482	157892	0.0675416	0.00939678	0.119668	3376.21	154516
WMG1.3-11	0.935	0.24	962376	3.43	137.26	3.1	10.59	95.31	42.67	475.91	976.05	1827.5	2909.53	4561.09	11060.8	9730.6	715532	0	<****	0	42.57	2.77	2.49	6132.13	47579.2	0.128883	<****	0	<****	<****	<****		0.200351	31833.8	0.0430267	0.000352496	0.00720725	249.69	31584.2
WMG11_1c	0.935	0	74639.9	8.89	24.57	20.36	30.16	81.68	24.07	198.55	260.62	398.22	559.37	806.87	1865.83	1767.26	63659.7	0	0	0	29.88	2.16	1.3	1879.07	27488.6	0.0683582	<****	0	<****	<****	<****		0.189009	6046.45	0.106414	0.00503039	0.0447746	165.66	5880.79
WMG11_5c	0.935	0.0149	69664.1	5.06	48.23	9.71	19.04	79.12	15.04	237.46	419.13	758.85	1139.26	1629.45	3369.82	2925.68	47244.9	0	0	0	43.24	2.99	4.56	7148.92	39995.4	0.178743	<****	0	<****	<****	<****		0.109726	10655.9	0.0704667	0.00172951	0.0213089	161.16	10494.7
WMG12_11	0.935	0.0098	85185.4	354.22	335.34	363.64	360.59	253.57	63.4	257.75	246.53	412.23	529.38	680.39	1449.56	1303.5	51199.2	0	0	0.55	8.77	0.656	0.8	1414.63	9331.33	0.1516	<****	0	<****	<****	<****		0.247994	6610.1	0.177813	0.271745	1.37428	1667.36	4942.74
WMG12_12	0.935	0.0045	82955.7	7.64	86.36	21.77	26.22	61.07	22.27	154.05	239.91	380.69	556.67	723.76	1412.43	1221.5	46748.4	0	0	0	5.61	0.653	0.711	830.69	5746.7	0.144551	<****	0	<****	<****	<****		0.229602	4914.34	0.109067	0.0062546	0.0495943	203.06	4711.28
WMG12_15	0.935	0.045	81301.4	23.16	102.01	52.26	67.05	171.04	80.94	405.02	572.46	881.23	1101.29	1262.53	2075.38	1494.46	39861.1	0	0	0	5.57	0.932	1.07	1452.17	6164.53	0.235569	<****	0	<****	<****	<****		0.307522	8288.83	0.195155	0.0154972	0.0571824	415.52	7873.31
WMG12_16	0.935	0.0233	86116.5	34.62	42.12	30.37	30.82	44.59	12.03	98.57	162.79	302.52	459.78	689.01	1346.51	1219.47	43803.1	0	0	0	6.69	0.629	0.812	1169.89	6854.52	0.170674	<****	0	<****	<****	<****		0.181457	4473.2	0.0732041	0.0283894	0.351222	182.52	4290.68
WMG12_17	0.935	0.0174	76926.4	0.659	10.29	1.653	6.85	39.09	25.25	142.84	223.61	369.85	571.89	736.63	1389.36	1278.13	35475.7	0	0	0	4.97	0.491	0.603	828.56	5165.1	0.160415	<****	0	<****	<****	<****		0.337912	4796.1	0.10281	0.000515597	0.00461355	58.542	4737.56
WMG12_18	0.935	0.0101	76576.2	0.257	22.23	0.968	3.33	24.65	10.66	103.44	186.76	329.86	537.43	792.28	1503.59	1285.76	45095.7	0	0	0.54	10.65	0.869	0.864	1357.92	10900.2	0.124578	<****	0	<****	<****	<****		0.211108	4801.22	0.0687953	0.000199882	0.00248453	51.435	4749.78
WMG12_1c	0.935	0.236	80349.8	548.82	574.85	624.11	634.62	573.83	124.05	827.25	966.68	1394.71	1906.32	2450.5	4102.73	3554.61	39966.6	0	0	0.79	21.85	1.61	2.71	4885.05	23007.6	0.212324	<****	0	<****	<****	<****		0.180047	18283.1	0.201634	0.154397	0.663427	2956.23	15326.9
WMG12_22	0.935	0	87615.4	3.78	34.4	7.3	14.37	45.38	15.28	145.86	243.3	425.82	662.87	1002.03	2373.74	2164.27	62238.8	0	0	0	29.35	1.99	1.82	3562.2	31465.4	0.11321	<****	0	<****	<****	<****		0.187812	7138.4	0.0614473	0.00174655	0.0259153	105.23	7033.17
WMG12_23	0.935	0.0251	84249.7	5.96	78.08	16.85	28.91	91.65	17.47	261.39	453.42	800.66	1200.98	1764.17	3522.85	3114.51	53664.2	0	0	0.52	32.2	3.05	3.42	5007.76	32730.7	0.152999	<****	0	<****	<****	<****		0.112871	11356.9	0.0741984	0.00191362	0.0228012	221.45	11135.5
WMG12_25	0.935	0.248	82222.1	105.98	165.83	158.67	201.29	339.7	97.4	633.37	914.22	1417.74	1949.53	2404.28	4968.04	4095.59	59128.7	0	0	1.46	67.76	5.11	6.07	12954.4	70308.3	0.184252	<****	0	<****	<****	<****		0.209982	17451.6	0.127489	0.0258766	0.167327	971.47	16480.2
WMG12_26c	0.935	0.0119	80914.3	123.34	149.78	156.03	143.66	150.07	68.88	275.39	411.25	633.03	949.33	1309.33	2257.93	1878.44	37471.1	0	0	0	15.62	1.07	2.4	4738.12	16546	0.286361	<****	0	<****	<****	<****		0.338822	8506.46	0.121966	0.0656609	0.447874	722.88	7783.58
WMG12_27	0.935	0.0067	86690.5	33.88	52.85	39.79	45.61	109.77	29.46	301.56	476.2	760.49	1215.64	1672.69	2948.77	2655.81	49340.2	0	0	0	15.4	1.04	1.59	2957.82	15683.7	0.188592	<****	0	<****	<****	<****		0.161921	10342.5	0.102266	0.0127569	0.112349	281.9	10060.6
WMG12_29	0.935	0.047	76408.6	13.03	120.76	22.76	40.99	155.51	26.09	549	951.84	1691.44	2632.98	3669.87	7208.06	6346.41	45674.6	0	0	0	61.82	4.01	8.26	15675	59973.5	0.261365	<****	0	<****	<****	<****		0.0892912	23428.7	0.0761647	0.00205313	0.0237341	353.05	23075.7
WMG12_2r	0.935	0.136	82165.5	1.334	18.77	2.021	4.69	24.87	6.51	99.33	186.01	322.37	515.57	759.54	1437.39	1394.39	47109.9	0	0	0	5.65	0.557	0.694	983.91	6011.75	0.163664	<****	0	<****	<****	<****		0.130979	4772.8	0.0691044	0.000956691	0.01343	51.685	4721.11
WMG12_3	0.935	0.0163	79409.4	0.07	6.26	1.137	4.2	26.08	20.14	119.64	192.43	343.07	482.72	713.56	1293.21	1186.34	39704.9	0	0	0	3.85	0.286	0.307	521.49	4037.83	0.129151	<****	0	<****	<****	<****		0.360552	4388.86	0.092514	5.9005e-05	0.000585089	37.747	4351.11
WMG12_33	0.935	0.0257	80788.4	0.575	29.2	2.67	8.88	54.84	12.31	190.61	367.33	591.4	963.15	1311.89	2577.59	2083.12	47965.7	0	0	0	19.47	1.29	1.86	3568.83	19670.8	0.181428	<****	0	<****	<****	<****		0.120403	8193.57	0.0739489	0.000276028	0.00301663	96.165	8097.4
WMG12_35c	0.935	0.039	89205.1	0.162	15.45	0.639	2.052	18.27	5.58	68.65	137.07	248.57	378	572.95	1232.1	1056.15	47141.2	0	0	0.76	7.61	0.869	0.85	915.59	7437.87	0.123098	<****	0	<****	<****	<****		0.15756	3735.64	0.0557179	0.000153387	0.0023598	36.573	3699.07
WMG12_36	0.935	0.0195	97219.7	0.22	17.1	0.582	1.855	6.66	2.91	50.59	92.55	188.52	302.14	483.86	954.34	1053.33	54861.8	0	0	0	5.22	0.578	0.531	598.91	5016.89	0.119379	<****	0	<****	<****	<****		0.158534	3154.66	0.0530105	0.000208861	0.00434869	26.417	3128.24
WMG12_37	0.935	0.039	96393.3	2.78	27.23	6.42	11.13	28.7	9.77	111.08	164.23	314.43	472.18	795.22	1607.97	1578.88	58642.7	0	0	1	23.99	1.8	1.63	2768.62	23783.7	0.116408	<****	0	<****	<****	<****		0.173036	5130.02	0.0690809	0.00176074	0.025027	76.26	5053.76
WMG12_5	0.935	0.045	80289.7	3.01	16.46	1.722	2.63	10.31	2.11	34.58	67.54	133.74	235.78	323.5	694.71	695.88	42637	0	0	0	4.08	0.368	0.365	436.55	4156.04	0.10504	<****	0	<****	<****	<****		0.111748	2221.97	0.0497762	0.00432546	0.0870445	34.132	2187.84
WMG12_7c	0.935	0.041	80426.9	0.286	23.25	2.65	8.03	47.45	19.4	185.86	328.62	580.15	877.74	1153.15	2236.92	1938.79	47566.7	0	0	1.2	13.76	1.88	2.36	1992.57	13425.5	0.148417	<****	0	<****	<****	<****		0.206581	7402.3	0.0830875	0.000147515	0.00153879	81.666	7320.63
WMG12_8c	0.935	0.078	79624.2	1.595	81.14	7.25	11.92	54.91	3.26	215.82	457.74	970.35	1738.54	3013.41	7921.33	7264.12	42500.3	0	0	0	97.24	6.29	9.44	17124.8	97235.2	0.176117	<****	0	<****	<****	<****		0.0299465	21741.4	0.0272454	0.000219572	0.00739042	156.815	21584.6
WMG12_9c	0.935	0.0255	74631.1	11.15	160.36	25.24	35.15	91.41	19.96	312.31	558.94	1142.42	1934.26	2781.38	6932.17	5833.09	57790	0	0	0	109.31	7.35	12.26	22632.6	108238	0.2091	<****	0	<****	<****	<****		0.118133	19837.8	0.0450523	0.00191151	0.0357017	323.31	19514.5
WMG1.3-median	0.935	0.04	83602.7	6.8	83.75	21.495	30.49	91.53	24.66	259.57	436.275	759.67	1120.28	1470.67	2763.18	2410.04	50269.7	0	0	0	26.67	1.935	2.38	4153.48	25636.1	0.162016	#NUM!	0	#NUM!	#NUM!	#NUM!		0.159987	9478.41	0.0939389	0.00282153	0.0261972	234.065	9244.34
mean	0.935	0.139256	309949	391.087	264.682	325.512	333.11	487.718	149.931	952.918	1584.46	2638.69	3780.4	5275.87	11271.6	9814.07	213361	0	0	0.599118	75.7832	5.44406	7.09932	15033.5	80755.5	0.170684	#DIV/0!	0	#DIV/0!	#DIV/0!	#DIV/0!		0.219928	37270	0.0845416	0.0398496	0.41041	1802.11	35467.9
std	4.50768e-16	0.207519	386051	1882.85	610.507	1366.47	1198.4	1053.32	301.186	1428.57	2349.63	3860.19	5387.16	7487.6	16284.4	14156.1	281266	0	0	1.63845	117.22	8.31588	10.5322	23183.4	126077	0.0486359	#DIV/0!	0	#DIV/0!	#DIV/0!	#DIV/0!		0.24553	57366.5	0.0877258	0.133005	1.318	6111.55	51254.9
max	0.935	0.82	979418	11020.9	3506.86	8009.92	7018.29	5677.58	1535.73	4596.41	7673.8	13196.3	18332.3	25700.7	55570.8	48442.4	788978	0	0	7.86	496.24	33.23	36.44	81679.2	519858	0.286361	0	0	0	0	0		0.300624	210282	0.0827126	0.227506	2.39773	35233.6	175048
min	0.935	0	69664.1	0.07	6.26	0.582	1.855	6.66	2.11	34.58	67.54	133.74	235.78	323.5	694.71	695.88	35475.7	0	0	0	3.85	0.286	0.307	436.55	4037.83	0.0683582	0	0	0	0	0		0.139038	2203.27	0.0497762	0.000100592	0.00202429	15.427	2187.84
																																	#DIV/0!	0	#DIV/0!	#DIV/0!	#DIV/0!	0	0
SHCR1.3-5r	0.935	0.3	1.02077e+06	517.55	575.31	419.97	453.23	563.13	123.01	999.21	1691.47	3017.36	4433.73	6786.56	15882.5	14490.7	643513	0	<****	0	57.29	4.07	4.38	10359	62536.3	0.165648	<****	0	<****	<****	<****		0.163986	49953.7	0.0629126	0.0357161	0.517959	2529.19	47424.5
SHCR1.3-1	0.935	0.37	979132	11.9	174.18	40.58	134.71	718.13	352.84	2321.02	3913.75	6800.86	9746.62	13654.4	28643.2	25596.8	575980	0	<****	5.92	78.89	5.26	8.24	20291.7	87197.4	0.23271	<****	0	<****	<****	<****		0.273298	92109	0.0810323	0.000464902	0.00512706	1079.5	91029.5
SHCR1.3-2	0.935	9.71	968793	736.46	631.82	811.78	995.45	1369.24	671.7	3294.56	5280.18	8899.26	12629	17116.1	33332.7	28977.7	557052	0	<****	6.17	101.74	6.71	8.69	20665.6	111892	0.184693	<****	0	<****	<****	<****		0.316255	114746	0.0988387	0.0254147	0.223538	4544.75	110201
SHCR1.3-3	0.935	0.55	995624	41.06	910.31	262.07	562.71	2403.24	755.86	6320.1	11725.8	21279	31102.9	43584.6	92856.6	78818.6	640097	0	<****	0	692.62	45.85	76.62	191802	758483	0.252876	<****	0	<****	<****	<****		0.193946	290623	0.068063	0.000520943	0.00649673	4179.39	286444
SHCR1.3-4	0.935	0.53	1.02845e+06	0	73.21	0	12.93	104.44	71.85	361.71	754.93	1462.34	2199.49	3370.16	8496.88	8005.35	616152	0	<****	0	21.27	1.393	1.767	4351.05	24559.9	0.177161	<****	0	<****	<****	<****		0.369669	24913.3	0.0425697	0	0	190.58	24722.7
SHCR1.3-5c	0.935	0.29	1012150	8.53	120.13	45.34	186.06	1076.75	598.34	3707.17	6286.39	10944.4	15531.3	20872.5	42166.1	36571.5	542147	0	<****	0	131.09	8.45	12.12	29958.8	144973	0.206651	<****	0	<****	<****	<****		0.299481	138115	0.0879183	0.000233241	0.00230095	1436.81	136678
SHCR1.3-6	0.935	0.3	1.03302e+06	57.84	537.8	39.58	97.4	489.36	137.92	1788.46	3506.89	6386.51	9987.58	14970.1	33391.5	30767.9	633224	0	<****	7.66	127.81	8.52	15.56	37516.8	140827	0.266403	<****	0	<****	<****	<****		0.147426	102159	0.0535603	0.00187988	0.0323407	1221.98	100937
SHCR1.3-7	0.935	0.104	1.02739e+06	6138.44	4944.75	4983.8	4993.7	3772.6	430.25	3527.51	4254.96	6113.55	8327.76	11269.8	23276.9	20232.4	657460	0	<****	0	73.36	4.65	6.24	15503.2	81991.7	0.189082	<****	0	<****	<****	<****		0.117941	102266	0.151546	0.303397	1.74016	24833.3	77433.1
SHCR1.3-8	0.935	0.42	1.03133e+06	11.08	204.64	11.88	52.21	226.26	100.85	882.91	1791.96	3369.09	5376.6	8017.39	18784.5	16865.6	686060	0	<****	0	49.09	3.19	4.23	10463.3	55652.6	0.188011	<****	0	<****	<****	<****		0.225639	55694.9	0.0470021	0.00065696	0.0125494	506.07	55188.8
SHCR1.3-9	0.935	0.174	1.03508e+06	2448.8	2487.65	2657.94	3007.58	2365.52	324.86	2939.24	4220.27	6989.59	10341.7	13840	28011.3	23405.3	684024	0	<****	0	300.05	19.17	23.77	58636.5	328893	0.178285	<****	0	<****	<****	<****		0.123201	103040	0.10493	0.104626	0.833141	12967.5	90072.3
SHCR1.3-10c	0.935	1.83	1.00026e+06	96.87	472.02	120.24	311.69	1333.05	493.24	3744.55	6297.27	10836.6	15386.4	20831.7	42717.6	37434.7	528928	0	<****	0	131.59	9.39	18.01	42330.8	143639	0.294702	<****	0	<****	<****	<****		0.220768	140076	0.0876582	0.0025877	0.0258696	2333.87	137742
SHCR1.3-11	0.935	8.8	999168	8.85	244.16	8.73	32.81	191.03	90.61	1047.11	2143.28	4206.19	6842.75	9976.73	23628.2	20071.2	726914	0	<****	0	161.73	10.38	8.36	20286.3	180185	0.112586	<****	0	<****	<****	<****		0.202595	68491.7	0.0443161	0.000440931	0.00845183	485.58	68006.1
SHCR1.3-12	0.935	1.09	1.05212e+06	22.99	442.86	64.79	140.98	758.44	286.15	2774.56	5297.76	9850.75	14409.4	20518.2	40804.1	35358.2	605019	0	<****	6.42	345.93	26.62	31.44	70669	379330	0.1863	<****	0	<****	<****	<****		0.197259	130729	0.0679971	0.000650203	0.008286	1430.06	129299
SHCR1.3-13	0.935	0.74	1.03365e+06	160.96	978.53	187.11	366.76	1604.18	237.22	5624.77	10909.2	20425.4	31710.4	46519.2	104592	91805.9	655766	0	<****	0	671.32	43.2	70.56	175139	734450	0.238463	<****	0	<****	<****	<****		0.0789719	315122	0.053778	0.00175326	0.0286163	3297.54	311825
SHCR1.3-14	0.935	0.21	1083771	0	427.89	37.53	146.35	842.45	244.56	2761.64	5184.31	9252.67	14225	19853	42156.2	36583.3	593893	0	<****	0	146.42	9.47	16.03	40531.8	163193	0.248367	<****	0	<****	<****	<****		0.160336	131715	0.0655096	0	0	1454.22	130261
SHCR1.3-15	0.935	0.67	1.02969e+06	17.15	173.4	54.47	174.39	1074.7	417.5	3566.06	6442.36	11455.8	16219	22953.1	46951.1	40531.7	574828	0	<****	0	189.51	12.82	24.23	55155.1	198367	0.278045	<****	0	<****	<****	<****		0.213264	150031	0.0759527	0.000423125	0.00480923	1494.11	148536
SHCR1.3-16	0.935	0.2	1.11352e+06	1905.77	1589.39	1523.22	1638.49	1389.75	301.13	1469.77	2116.79	3521.23	5223.44	7382.32	16550.9	15098.4	720423	0	<****	0	59.31	3.94	4.17	10391	65371.1	0.158954	<****	0	<****	<****	<****		0.210698	59710.6	0.0888031	0.126223	1.29665	8046.62	51663.9
SHCR11_1	0.935	0.0149	75647.6	12.02	19.43	16.72	23.95	67.81	43.6	203.53	320.14	524.32	745.27	1078.17	2021.87	1749.03	39301.2	0	0	0	7.63	0.833	0.925	1029.08	6871.06	0.14977	<****	0	<****	<****	<****		0.371129	6825.86	0.100664	0.00687238	0.0590576	139.93	6685.93
SHCR11_11	0.935	0.0316	75229.7	0.222	11.65	0.571	1.97	11.07	5.43	44.83	83.33	168.91	262.18	401.82	963.97	906.4	46399.3	0	0	0	3.54	0.477	0.518	447.1	3311.46	0.135016	<****	0	<****	<****	<****		0.243748	2862.35	0.0465056	0.000244925	0.00495204	25.483	2836.87
SHCR11_12	0.935	0.0351	74467.6	0.415	17.2	0.723	2.3	14.9	6.12	66.64	124.27	243.45	370.41	586.08	1347.61	1184.32	49679.3	0	0	0.55	7.62	0.927	1.067	1029.96	6928.18	0.148662	<****	0	<****	<****	<****		0.194219	3964.44	0.0494505	0.000350412	0.00622749	35.538	3928.9
SHCR11_13c	0.935	0.0166	72512.1	0.0235	33.1	2	7.19	45.9	23.3	178.5	290.25	536.13	759.03	1148.32	2367.32	1940.8	42149.2	0	0	0	18.31	1.306	2.02	3458.26	18726.4	0.184673	<****	0	<****	<****	<****		0.257413	7331.86	0.0754017	1.21084e-05	0.000131653	88.2135	7243.65
SHCR11_14	0.935	0.0321	70879.3	1.686	12.86	9.84	2.84	15.27	7.26	56.69	101.34	191.36	309.71	492.67	1081.23	995.75	47689.9	0	0	1.11	4.88	1.071	1.119	510.07	4006.18	0.127321	<****	0	<****	<****	<****		0.246754	3278.51	0.052431	0.0016932	0.0297407	42.496	3236.01
SHCR11_16	0.935	0.329	67440	0.199	15.17	0.342	2.2	14.48	4.93	57.95	105	207.52	333.39	504.75	1160.27	1089.4	43791.4	0	0	1.45	7.77	1.057	1.15	868.14	6709.37	0.129392	<****	0	<****	<****	<****		0.170191	3495.6	0.0499453	0.000182669	0.00343399	32.391	3463.21
SHCR11_19c	0.935	0.124	60393.3	0.945	31.41	4.8	9.16	52.3	10.51	161.81	270.86	506.87	769.12	1264.02	3410.57	2612.38	45209.3	0	0	0	50.9	3.83	3.46	4883.34	48810.4	0.100047	<****	0	<****	<****	<****		0.114248	9104.76	0.0474437	0.000361739	0.00584018	98.615	9006.14
SHCR11_21	0.935	0.0159	68884.2	54.75	59.22	55.5	48.64	48.96	10.83	67.51	99.23	180.61	272.81	422.59	1039.35	893.91	45596.5	0	0	0	4.02	0.414	0.431	472.57	4006.68	0.117946	<****	0	<****	<****	<****		0.188375	3253.91	0.0649541	0.0612478	0.810991	267.07	2986.84
SHCR11_23	0.935	0.0339	77821.9	0.285	17.32	1.74	4.95	30.64	15.93	112.35	190.22	333.36	545.04	816.69	1665.3	1559.45	47666.5	0	0	0	5.22	0.602	0.811	1069.63	5242.16	0.204044	<****	0	<****	<****	<****		0.271509	5293.27	0.0674653	0.000182757	0.00253672	54.935	5238.34
SHCR11_25	0.935	0.0319	69023.6	0.957	16.05	2.5	5.99	35.45	14.23	109.58	188.33	332.04	519.98	746.92	1685.02	1413.64	39971.8	0	0	0	5.72	0.519	0.801	1067.33	5928.34	0.180039	<****	0	<****	<****	<****		0.228313	5070.69	0.0650319	0.000676976	0.00873335	60.947	5009.74
SHCR11_27	0.935	0.173	67860.8	85.46	89.19	83.44	88.2	106.8	36.12	207.61	295.05	493.39	729.76	969.26	2157.69	1669.96	39566.9	0	0	0	9.93	1.042	1.258	1525.27	10272.5	0.148481	<****	0	<****	<****	<****		0.24257	7011.93	0.0962186	0.0511749	0.411637	453.09	6558.84
SHCR11_28	0.935	0.023	66176.2	0.6	8.94	1.058	2.76	16.96	8.14	64.85	113.99	215.85	313.49	472.54	1101.32	937.02	37264.1	0	0	0	5.49	0.525	0.562	716.66	5702.28	0.12568	<****	0	<****	<****	<****		0.245446	3257.52	0.0588839	0.000640328	0.00925212	30.318	3227.2
SHCR11_34	0.935	0.0223	66736.6	0.678	13.47	1.134	2.85	14.39	6.28	60.22	104.78	200.52	337.51	461.94	1110.46	998.15	41743.2	0	0	0.8	5.6	0.643	0.771	823.47	5907.68	0.13939	<****	0	<****	<****	<****		0.213333	3312.38	0.0542298	0.000679257	0.0112587	32.522	3279.86
SHCR11_35	0.935	0.123	62337.8	10.8	27.03	7.71	8.96	26.97	7.51	86.31	149.95	279.15	442.3	663.51	1522.15	1310.25	38271.9	0	0	0	7.45	0.83	1.077	1186.89	7476.95	0.15874	<****	0	<****	<****	<****		0.155657	4542.6	0.0567027	0.0082427	0.12513	81.47	4461.13
SHCR11_36	0.935	0.0222	69390.2	0.184	7.82	3.16	9.35	50.48	54.23	180.97	291.73	503.54	743.14	942.91	1998.76	1655.18	37088.3	0	0	0	5.62	0.496	0.606	907.83	6087.66	0.149126	<****	0	<****	<****	<****		0.567383	6441.45	0.0905411	0.000111166	0.00101674	70.994	6370.46
SHCR11_37	0.935	0.0184	68925.2	0.609	27.17	2.06	4.9	25.63	11.06	91.49	173.56	307.75	481.58	755.37	1558.41	1571.62	51326.9	0	0	1.31	7.33	1.11	1.234	1227.57	7195.39	0.170605	<****	0	<****	<****	<****		0.228399	5011.21	0.0587073	0.000387498	0.00665647	60.369	4950.84
SHCR11_38	0.935	0.0227	59786	44.23	74.37	42.02	43.22	53.58	10.75	128.07	226.82	413.47	602.14	833.02	1914.89	1662.68	44240.2	0	0	1.68	16.6	2.22	2.72	2405.08	17011.3	0.141382	<****	0	<****	<****	<****		0.129773	6049.26	0.0668811	0.0266016	0.345358	257.42	5791.84
SHCR11_4	0.935	0.105	66708.2	412.03	354.42	431.92	388.35	262.32	55.14	266.41	249.52	359.06	474.15	668.95	1446.54	1300.62	44918.7	0	0	0.79	11.76	1.333	1.51	1582.72	10814.3	0.146355	<****	0	<****	<****	<****		0.208582	6669.43	0.184171	0.316795	1.5466	1849.04	4820.39
SHCR11_6	0.935	1.04	77250.7	21.09	40.74	30.71	33.55	93.59	16.73	249.15	442.12	737.85	1173.62	1658.34	3170.12	2657.95	46214.7	0	0	0	24.64	1.731	2.33	4235.81	24342	0.174012	<****	0	<****	<****	<****		0.10956	10325.6	0.0785932	0.00793469	0.0846478	219.68	10105.9
SHCR11_7c	0.935	0.0588	69609.4	2.178	22.4	4.4	12.21	60.94	24.63	232.1	370.83	689	957.23	1338.11	2551.89	2031.87	44355.7	0	0	0	14.88	1.146	1.435	2057.16	14115.7	0.145736	<****	0	<****	<****	<****		0.207098	8297.79	0.0909522	0.00107192	0.00938389	102.128	8195.66
SHCR11_9c	0.935	0.0179	75431.7	18.89	36.63	34.5	31.24	124.03	19.53	265.15	431.36	739.56	1072.78	1520.82	2951.15	2328.66	40477.5	0	0	0	20.09	1.483	1.98	3090.34	19770.2	0.156313	<****	0	<****	<****	<****		0.107694	9574.3	0.0898463	0.00811196	0.0712427	245.29	9329.01
SHCR12_10	0.935	0	97816.6	0.245	10.76	1.845	7.97	44.26	23.8	170.94	292.21	502.95	769.1	1085.28	1911.95	1888.86	40464.2	0	0	0	15.91	1.11	1.63	3042.39	16133.7	0.188574	<****	0	<****	<****	<****		0.273621	6710.17	0.0894061	0.000129708	0.00143325	65.08	6645.09
SHCR12_11	0.935	0.0092	99714.6	0	13.19	0	1.43	9.99	4.07	38.35	85.68	163.26	288.97	447.16	938.17	1019	51336.6	0	0	0	4.39	0.394	0.353	614.02	4644.81	0.132195	<****	0	<****	<****	<****		0.207936	3009.27	0.0408775	0	0	24.61	2984.66
SHCR12_12	0.935	0.028	96231.6	1.342	20.17	3.81	8.23	45.05	17.25	149.38	254.33	421.62	703.21	1047.58	1797.46	1918.5	51523.8	0	0	1.27	6.06	0.86	1.03	1345.11	6022.17	0.22336	<****	0	<****	<****	<****		0.210279	6387.93	0.0831062	0.000699505	0.0089838	78.602	6309.33
SHCR12_2	0.935	0.0056	89902.4	2.12	15.65	2.19	4.23	21.23	8.61	76.84	141.87	262.99	413.12	606.51	1299.21	1212.28	43171.6	0	0	0.95	5.31	0.487	0.611	838.65	5260.19	0.159433	<****	0	<****	<****	<****		0.213174	4066.85	0.0591436	0.00174877	0.0275898	45.42	4021.43
SHCR12_3	0.935	0	96391.3	0	10.88	0.164	0.929	6.58	4.2	39.2	78.51	156.59	253.65	387.68	845.33	828.88	46047.6	0	0	0	3.18	0.353	0.397	420.23	3141.73	0.133758	<****	0	<****	<****	<****		0.261513	2612.59	0.0463724	0	0	18.553	2594.04
SHCR12_4	0.935	0.036	88846.5	0.343	21.77	1.945	4.97	36.92	10.24	134.74	244.18	436.72	688.6	1051.82	1886.36	2042.55	46836.4	0	0	0	10.64	0.735	1.08	2040.65	11064.7	0.184429	<****	0	<****	<****	<****		0.145185	6561.16	0.0714286	0.000167927	0.00254564	65.948	6495.21
SHCR12_5	0.935	0	93110.4	0.123	8.4	0.591	1.595	8.86	4.57	43.89	85.34	154.59	254.42	361.09	780.11	778.24	45108.8	0	0	0	4.24	0.346	0.309	489.03	4199.47	0.11645	<****	0	<****	<****	<****		0.231748	2481.82	0.0562613	0.000158049	0.00280246	19.569	2462.25
SHCR12_6	0.935	0.006	80309.3	0.036	13.67	2.37	7.65	37.06	22.01	160.06	256.01	474.66	706.1	985.27	1783.52	1640.24	41479.3	0	0	0	7.84	0.71	0.86	1274.38	7749.55	0.164446	<****	0	<****	<****	<****		0.285776	6088.66	0.0897439	2.1948e-05	0.000224916	60.786	6027.87
SHCR12_8	0.935	0.026	90060.6	0.145	13.15	0.34	1.342	7.17	2.96	39.82	87.67	157.35	272.59	424.53	887.25	863.82	50922.2	0	0	1.47	4.61	0.581	0.58	532.77	4465.97	0.119295	<****	0	<****	<****	<****		0.175179	2758.14	0.0448802	0.000167859	0.00364139	22.147	2735.99
SHCR12_9	0.935	0.028	93021.4	0.313	14.8	0.16	1.709	9.54	4.82	52.11	103.97	181.83	310.41	463.53	963.88	996.63	51483.3	0	0	0	5.15	0.62	0.713	675.35	4892.63	0.138034	<****	0	<****	<****	<****		0.216178	3103.7	0.0540627	0.000314058	0.00600652	26.522	3077.18
SHCR1.3-median	0.935	0.036	89902.4	2.12	31.41	7.71	12.21	52.3	22.01	178.5	290.25	502.95	743.14	1051.82	1998.76	1888.86	47666.5	0	0	0	11.76	1.11	1.435	2040.65	11064.7	0.184429	#NUM!	0	#NUM!	#NUM!	#NUM!		0.227798	6782.04	0.0893054	0.00112237	0.0118768	105.75	6676.29
mean	0.935	0.598294	413163	267.858	334.71	250.402	293.381	451.696	127.764	1060.99	1834.79	3247.64	4803.5	6794.23	14449.2	12630.7	250475	0	0	0.782292	76.0698	5.26821	7.70344	17915	82674	0.171909	#DIV/0!	0	#DIV/0!	#DIV/0!	#DIV/0!		0.184557	46546.9	0.0734288	0.0212069	0.252461	1598.05	44948.8
std	3.36592e-16	1.86022	459275	977.405	819.066	830.048	857.813	783.812	195.148	1595.66	2840.69	5105.03	7559.14	10699.6	22957.7	19902.4	283157	0	0	1.83203	148.327	9.77143	15.6272	38925.2	162614	0.0455519	#DIV/0!	0	#DIV/0!	#DIV/0!	#DIV/0!		0.174498	75123.5	0.0695042	0.04911	0.61254	4268.14	70855.4
max	0.935	9.71	1.11352e+06	6138.44	4944.75	4983.8	4993.7	3772.6	755.86	6320.1	11725.8	21279	31710.4	46519.2	104592	91805.9	726914	0	0	7.66	692.62	45.85	76.62	191802	758483	0.294702	0	0	0	0	0		0.154796	339542	0.060426	0.0668633	0.971257	24833.3	314709
min	0.935	0	59786	0	7.82	0	0.929	6.58	2.96	38.35	78.51	154.59	253.65	361.09	780.11	778.24	37088.3	0	0	0	3.18	0.346	0.309	420.23	3141.73	0.100047	0	0	0	0	0		0.186336	2462.83	0.0491597	0	0	15.329	2447.5
																																	#DIV/0!	0	#DIV/0!	#DIV/0!	#DIV/0!	0	0
SAFT8.2-6r	0.935	0	1.13624e+06	0	292.81	4.24	17.79	60.33	193.92	282.69	690.82	1772.67	3811.3	7816	29131.3	29670.6	398682	0	<****	0	313.79	19.73	34.13	86104.4	345377	0.249305	<****	0	<****	<****	<****		1.48491	73744.5	0.00970399	0	0	375.17	73369.3
SAFT8.2-1r	0.935	0	1.06073e+06	2.71	640.78	30.42	79.58	310.95	1205.97	1196.27	2332.2	5015.77	10237.7	20597.5	69937	66633.7	393310	0	<****	0	904.6	57.59	185.32	465391	997904	0.466368	<****	0	<****	<****	<****		1.97732	178221	0.017105	4.06701e-05	0.00226537	1064.44	177156
SAFT8.2-1c	0.935	2.81	1.05929e+06	62.2	298.29	43.63	35.43	53.89	368.98	246.53	515.79	1241.32	2633.44	5459.5	24222.6	25635.4	437548	0	<****	0	555.24	35.08	69.45	175303	616807	0.284211	<****	0	<****	<****	<****		3.20121	60817	0.0101777	0.00242633	0.252302	493.44	60323.6
SAFT8.2-2	0.935	2.18	1.02281e+06	17.83	2027.22	34.72	116.65	470.62	719.88	1541.77	3092.76	6440.89	11132.8	19434.8	52789.6	46459.7	322494	0	<****	0	1349.24	86.15	544.01	1.21857e+06	1.41352e+06	0.862083	<****	0	<****	<****	<****		0.845114	144279	0.029206	0.000383774	0.0115646	2667.04	141612
SAFT8.2-3	0.935	0.077	1.1075e+06	3.7	354.48	16.77	36.65	242.92	707.17	946.75	1937.87	4100.57	7914.57	14923.1	48891.4	45623.4	386189	0	<****	0	483.36	30.61	84.55	214796	533419	0.402678	<****	0	<****	<****	<****		1.4746	125699	0.0193644	8.10987e-05	0.00390811	654.52	125045
SAFT8.2-4	0.935	2.27	1.04815e+06	229.22	971.67	165.61	228.95	400.52	1094.69	989.18	2107.57	4577.32	9154.7	19952.3	81424.9	79898.1	326095	0	<****	0	1096.6	70.88	267.31	697662	1.16241e+06	0.600185	<****	0	<****	<****	<****		1.73917	201195	0.0121484	0.0028689	0.231727	1995.97	199199
SAFT8.2-5	0.935	0.111	1.0549e+06	4.24	565.38	10.88	24.54	90.59	315.39	454.52	1066.08	2423.71	4607.73	9158.07	31623.5	30179.7	367569	0	<****	0	585.44	37.14	102.93	264525	653775	0.404612	<****	0	<****	<****	<****		1.55429	80524.3	0.0143729	0.000140492	0.00932852	695.63	79828.7
SAFT8.2-6c	0.935	0.07	1.09047e+06	17.79	813.43	42.94	77.73	308.64	714.68	1202.16	2393	5281.47	10063.3	19111.9	59204.8	55377.5	370544	0	<****	0	644.41	40.52	114.67	288958	709864	0.407061	<****	0	<****	<****	<****		1.17329	154609	0.0203051	0.00032125	0.0147984	1260.53	153349
SAFT8.2-7	0.935	0.8	1120347	96.97	1512.16	63.24	111.99	386.82	764.3	1310.3	2911.24	6249.61	10921.8	19408.8	58626.7	52891.3	338472	0	<****	0	845.78	55.66	204.89	500834	926497	0.540568	<****	0	<****	<****	<****		1.07355	155255	0.0223499	0.00183338	0.074006	2171.18	153084
SAFT8.2-8	0.935	2.25	1.07124e+06	153.03	580.12	88.82	133.01	208.17	411.17	576.4	928.38	1782.75	3328.63	6582.08	26456.6	27031.4	462003	0	<****	5.54	609.24	39.68	197.33	499930	681285	0.733805	<****	0	<****	<****	<****		1.187	68260.6	0.0217866	0.00566119	0.265493	1163.15	67097.4
SAFT8-1	0.935	0.0046	80336.7	0.0446	35.36	0.605	2.08	10.93	25.67	40.93	92.07	197.74	407.26	804.41	2648.14	2482.15	26052.7	0	0	0	41.3	2.67	6.07	11390.5	39980.7	0.2849	<****	0	<****	<****	<****		1.21365	6747.39	0.0154561	1.79683e-05	0.00108967	49.0196	6698.37
SAFT8-10	0.935	0.0075	78045.6	2.71	106.54	2.92	5.88	25.01	44.59	91.22	179.96	393.86	731.94	1413.01	3810.04	3517.15	21934.2	0	0	0	74.17	4.89	16.68	30102	68087.5	0.442108	<****	0	<****	<****	<****		0.933546	10324.8	0.023942	0.00077051	0.0297084	143.06	10181.8
SAFT8-11	0.935	0.102	82773.7	1.126	123.6	2.45	6.71	29.17	46.98	93.61	213.03	464.17	812.81	1527.54	4666.12	3768.48	24254	0	0	0	80.87	5.13	17	29571.8	75142.4	0.393543	<****	0	<****	<****	<****		0.89905	11755.8	0.0200616	0.000298794	0.0120286	163.056	11592.7
SAFT8-13	0.935	0.052	78649.3	26.64	197.88	18.42	21.26	47.65	69.71	133.34	261.98	561.39	1050.12	1913.24	5505.11	4822.36	21640.4	0	0	0.79	114.68	7.81	34.57	87077.4	103609	0.840439	<****	0	<****	<****	<****		0.874548	14629.1	0.0242211	0.00552427	0.19979	311.85	14317.2
SAFT8-14	0.935	0.0137	82856.7	146.42	101.35	42.06	26.22	9.82	18.22	17.06	30.84	66.92	125.85	291.8	1056.52	1039.75	24267	0	0	0.79	30.38	2.61	5.5	12639.1	27021.4	0.467745	<****	0	<****	<****	<****		1.40768	2972.83	0.0161474	0.140822	8.58265	325.87	2646.96
SAFT8-15	0.935	0.0214	82068.2	0.271	114.61	1.713	4.82	26.74	47.55	85.2	195.51	411.48	770.05	1455.84	4267.43	3526.81	22636.2	0	0	0	82.91	5.44	16.43	28098.2	77113	0.364376	<****	0	<****	<****	<****		0.996208	10908	0.0199652	7.684e-05	0.00318075	148.154	10759.9
SAFT8-17	0.935	0.057	74734.5	0.0884	52.76	0.731	2.24	11.54	27.77	39.69	92.82	213.19	419.15	868.06	3001.75	2601.19	26980.6	0	0	0	60.85	3.94	9.11	15475.9	58426.1	0.264879	<****	0	<****	<****	<****		1.29757	7330.98	0.0132223	3.39844e-05	0.00222726	67.3594	7263.62
SAFT8-18	0.935	0.135	77981.1	3.52	90.82	3.54	8.15	46.86	53.06	152.75	301.12	595.88	1022.85	1798.4	5121.15	3937.7	21549.9	0	0	0	47.43	3.01	9.05	16111	43536	0.370062	<****	0	<****	<****	<****		0.627156	13135.8	0.0298273	0.000893923	0.0230442	152.89	12982.9
SAFT8-19	0.935	0.0092	81893.2	1.152	69.2	1.567	3.3	15.43	28.03	46.19	106.11	229.85	442.74	890.54	2857.9	2392.99	27112.9	0	0	0.28	84.28	5.33	17.04	29312.5	80263.1	0.365205	<****	0	<****	<****	<****		1.04994	7085	0.0161622	0.000481406	0.0249405	90.649	6994.35
SAFT8-20	0.935	0.032	82359.6	0.908	77.03	1.439	3.57	16.28	32.98	59.3	126.41	270.72	507.59	1054.54	3280.67	2843.93	24531.6	0	0	0	63.63	4.17	10.37	17058.2	62499.5	0.272934	<****	0	<****	<****	<****		1.06144	8275.37	0.0180756	0.000319276	0.015312	99.227	8176.14
SAFT8-21	0.935	0.0396	75576.1	0.463	34.89	0.873	1.79	9.25	20.57	32.44	66.87	162.99	332.65	668.78	2584.55	2030.4	23660	0	0	0	37.98	2.38	5.21	8780.49	35264.9	0.248987	<****	0	<****	<****	<****		1.18747	5946.52	0.0125515	0.000228034	0.0142725	47.266	5899.25
SAFT8-22	0.935	0.0333	82222.4	1.177	109.04	3.28	6.86	30.42	66.2	100.21	219.92	467.43	872.42	1605.23	4857.35	4134.99	24907.1	0	0	0	82.4	5.19	16.42	28040.3	77369.4	0.362422	<****	0	<****	<****	<****		1.19901	12474.5	0.0206306	0.000284644	0.0117453	150.777	12323.8
SAFT8-23	0.935	0.06	78975.7	4.27	101.44	5.9	8.44	24.74	44.9	82.24	168.65	370.78	691.55	1360.29	4117.57	3306.3	23104.3	0	0	0	67.45	4.43	12.76	21893.5	65885	0.332299	<****	0	<****	<****	<****		0.995417	10287.1	0.0199729	0.00129147	0.0519212	144.79	10142.3
SAFT8-24	0.935	0.021	81166	2.32	63.58	2.25	3.66	14.36	32.83	46.83	101.2	227.26	461.26	914.1	3022.36	2406.12	26987	0	0	0	66.68	4.19	12.18	20477	62285.8	0.328758	<****	0	<****	<****	<****		1.26599	7298.13	0.0154945	0.000964208	0.0495409	86.17	7211.96
SAFT8-26	0.935	0.055	76899.1	4.96	90.42	7.06	10.51	31.1	47.08	92.62	188.88	370.61	677.55	1280.8	3833.99	3133.48	26250.8	0	0	0	65.65	4.32	14.68	23573.5	61283.2	0.384665	<****	0	<****	<****	<****		0.877211	9769.06	0.0241576	0.0015829	0.0535521	144.05	9625.01
SAFT8-27	0.935	0.0069	80056.5	0.743	194.11	9.02	24.74	98.55	104.98	295.9	594.28	1065.46	1839.78	3081.8	8025.02	6374.16	22370.8	0	0	0	85.2	5.47	21.49	36831.4	79464.2	0.463496	<****	0	<****	<****	<****		0.61476	21708.5	0.0368722	0.000116564	0.00251098	327.163	21381.4
SAFT8-28	0.935	0.0333	79704.8	0.318	51.42	1.864	4.62	23.64	43.03	70.4	147.45	319.08	635.14	1166.4	3880.91	3181.22	25067.5	0	0	0	49.85	3.23	8.37	14683.8	47294.8	0.310474	<****	0	<****	<****	<****		1.05478	9525.49	0.0181401	9.99616e-05	0.00451705	81.862	9443.63
SAFT8-29	0.935	0.0218	79340.5	0.998	51.47	0.912	2.18	11.2	23	37.44	80.47	174.54	355.88	713.9	2595.46	2158.75	25845.3	0	0	0	60.89	4.05	10.69	18319.7	59781.1	0.306445	<****	0	<****	<****	<****		1.12318	6206.2	0.0144252	0.000462305	0.026656	66.76	6139.44
SAFT8-3	0.935	0.06	76704	3.11	51.63	1.728	2.63	10.48	24.94	37.46	77.61	180.75	362.67	729.62	2278.49	1992.65	24404	0	0	0	58.13	3.9	11.05	19843.8	54624.5	0.363277	<****	0	<****	<****	<****		1.25873	5753.77	0.0164407	0.00156074	0.0830219	69.578	5684.19
SAFT8-30	0.935	0.074	77501	2.29	40.93	2.99	4.64	15.18	37.95	59.4	121.29	263.68	548.41	1016.24	3404.47	2975.32	25475.9	0	0	0.238	38.9	2.54	6.38	11736.9	37694.3	0.311369	<****	0	<****	<****	<****		1.26381	8492.79	0.0174476	0.000769665	0.0385522	66.03	8426.76
SAFT8-31	0.935	0.056	81074.9	1.107	58.47	1.818	4.29	16.95	36.13	62.82	133.9	297.81	608.27	1154.28	3760.05	3268.46	25084	0	0	0	49.47	3.39	8.57	15666.2	46913.2	0.33394	<****	0	<****	<****	<****		1.10722	9404.35	0.0167072	0.000338692	0.0176218	82.635	9321.72
SAFT8-32	0.935	0.177	75482	15.9	203.46	18.4	27.26	57.53	83	171.57	315.62	627.5	1129.11	1935.78	5371.52	4135.96	21252.6	0	0	0	86.95	5.57	27.08	48493.4	81078.4	0.598105	<****	0	<****	<****	<****		0.83543	14092.6	0.0319407	0.00384433	0.0926735	322.55	13770.1
SAFT8-33	0.935	0.062	84841.3	0.4	58.52	0.877	2.41	9.96	26.07	40.22	89.37	199.81	394.97	754.83	2660.91	2247.52	27517.5	0	0	0	71.62	4.56	14.15	24623.3	66732.9	0.368983	<****	0	<****	<****	<****		1.30254	6485.87	0.0151151	0.000177974	0.0099453	72.167	6413.7
SAFT8-34	0.935	0.085	78693.3	2.71	34.13	2.39	4.17	19.42	40.1	62.87	125.57	277.94	543.63	1016.13	3410.82	2735.92	26641.9	0	0	0	41.61	2.7	7.18	12849.5	38830.3	0.330914	<****	0	<****	<****	<****		1.14762	8275.8	0.0184325	0.000990526	0.0431048	62.82	8212.98
SAFT8-35	0.935	0.0155	76223.4	0.096	34.48	1.579	4.3	20.83	42.87	70.74	146.52	310.36	614	1156.51	3770.83	3106.32	25274.2	0	0	0	44.89	2.88	8.16	14639.1	41795.9	0.350251	<****	0	<****	<****	<****		1.1168	9279.43	0.0187598	3.09047e-05	0.00135708	61.285	9218.15
SAFT8-37	0.935	0.059	79184.9	0.1267	27.42	0.924	2.89	11.16	31.85	56.09	105.45	236.95	445.45	826.31	2830.82	2777.44	26981.7	0	0	0	37.54	2.39	6.65	13217.2	34865.3	0.379094	<****	0	<****	<****	<****		1.27302	7352.88	0.019814	4.56175e-05	0.00225887	42.5207	7310.36
SAFT8-4	0.935	0	83724.3	0.57	60.17	0.874	2.56	12.76	26.28	50.47	110.47	242.1	498.67	967.06	3057.75	2765.18	27203.9	0	0	0	53.42	3.48	9.21	17152.2	50555.8	0.339272	<****	0	<****	<****	<****		1.03558	7794.91	0.0165056	0.000206135	0.0112938	76.934	7717.98
SAFT8-5	0.935	0.0072	81481.9	1.449	51	2.61	6.28	25.11	54.64	87.21	186.75	401.32	784.6	1506.48	4621.89	4302.17	26443.2	0	0	0	50.02	3.29	9.23	17888	47166.6	0.379251	<****	0	<****	<****	<****		1.16763	12031.5	0.0188689	0.000336807	0.0166151	86.449	11945.1
SAFT8-6	0.935	0.082	82384.3	5.21	44.18	9.17	10.72	16.12	42.4	37.18	70.61	169.28	344.27	689.75	2364.87	2208.12	27933.3	0	0	0	35.27	2.26	4.89	9539.87	33513.5	0.284657	<****	0	<****	<****	<****		1.73192	6011.88	0.0157218	0.00235947	0.140129	85.4	5926.48
SAFT8-7	0.935	0.096	80035.1	7.7	86.32	3.97	5.22	18	35.89	63.6	129.47	279.6	534.2	1056.28	3011.4	2689.4	23346.4	0	0	0	87.08	5.65	19.48	35429.2	80939	0.437727	<****	0	<****	<****	<****		1.06074	7921.05	0.0211197	0.00286309	0.121069	121.21	7799.84
SAFT8-8	0.935	0.0405	84790.2	0.0876	17.71	2.3	7.51	31.65	60.38	88	137.72	222.06	325.2	466.33	1137.17	1010.47	32762.9	0	0	0	3.68	0.237	0.651	1295.25	3705.69	0.34953	<****	0	<****	<****	<****		1.1441	3506.59	0.0773851	8.66923e-05	0.000995455	59.2576	3447.33
SAFT8-9	0.935	0.0143	80156.1	0.266	27.21	0.863	1.248	5.41	16.97	21.5	49	106.43	229.52	493.29	1996.08	1697.58	33253.2	0	0	0	39.71	2.56	6.24	11258.1	36830.8	0.305671	<****	0	<****	<****	<****		1.57349	4645.37	0.0107711	0.000156694	0.0123721	34.997	4610.37
SAFT8-median	0.935	0.0555	81324	2.305	88.37	2.955	6.495	24.875	44.745	83.72	158.05	344.845	656.345	1223.6	3822.01	3224.84	26347	0	0	0	67.065	4.375	13.455	22733.5	64192.2	0.354147	#NUM!	0	#NUM!	#NUM!	#NUM!		0.980502	9683.16	0.0219047	0.000714764	0.0275323	125	9558.16
mean	0.935	0.302545	278316	20.6033	239.597	15.5927	24.9527	72.8855	160.822	242.353	497.99	1061.91	1981.91	3765.2	12401.2	11466.7	95591	0	0	0.19095	201.605	12.9847	49.192	114091	211928	0.404275	#DIV/0!	0	#DIV/0!	#DIV/0!	#DIV/0!		1.21004	31951.7	0.0195426	0.0017968	0.0850136	373.632	31578.1
std	0.124945	1.42119	399733	826.98	736.537	671.86	673.213	515.695	284.495	910.311	1707.94	3191.22	5030.13	8142	22904.5	21256	162504	0	0	1.28673	303.913	19.4981	89.2156	212016	329926	0.165709	#NUM!	0	#NUM!	#NUM!	#NUM!		0.415225	66850.8	0.0397438	0.0389058	0.908459	3424.29	63426.5
max	0.935	2.81	1120347	229.22	2027.22	165.61	228.95	470.62	1094.69	1541.77	3092.76	6440.89	11132.8	19952.3	81424.9	79898.1	462003	0	0	5.54	1349.24	86.15	544.01	1.21857e+06	1.41352e+06	0.862083	0	0	0	0	0		1.28513	207700	0.0189349	0.0028689	0.148673	3121.62	204578
min	0.935	0	74734.5	0.0446	17.71	0.605	1.248	5.41	16.97	17.06	30.84	66.92	125.85	291.8	1056.52	1010.47	21252.6	0	0	0	3.68	0.237	0.651	1295.25	3705.69	0.248987	0	0	0	0	0		1.76642	2641.45	0.0161474	4.41379e-05	0.0026143	25.0176	2616.43
																																	#DIV/0!	0	#DIV/0!	#DIV/0!	#DIV/0!	0	0
SAFT10-1	0.935	0.241	910888	95.52	557.22	125.78	247.96	918.42	530.52	2478.55	4842.89	8998.33	13777	21996.3	56855.8	51104.4	551864	0	0	3.31	851.91	55.3	88.95	208164	886782	0.234741	<****	0	<****	<****	<****		0.351627	162529	0.0435936	0.00186911	0.0385387	1944.9	160584
SAFT10-2	0.935	0.204	898508	0.56	257.07	9.96	41.29	207.56	139.17	548.39	1200.82	2335.88	3872.02	6270.73	18588.7	17496.9	494837	0	0	0	524.71	33.23	38.1	89320.6	576966	0.154811	<****	0	<****	<****	<****		0.412505	50969	0.0295013	3.20057e-05	0.00102117	516.44	50452.5
SAFT10-3c	0.935	0.269	903273	3.24	138.67	5.56	19.02	74.6	55.61	222.53	482.77	1070.69	1798.68	3114.91	9620.82	9167.28	512315	0	0	0	216.55	14.02	11.73	26569.2	240366	0.110537	<****	0	<****	<****	<****		0.431608	25774.4	0.02313	0.000353431	0.0145598	241.09	25533.3
SAFT10-4c	0.935	0.431	878513	96.59	307.49	169.17	265.71	666.73	808.31	1555.88	2921.38	5385.66	8181.8	13050.8	36555.7	33137.2	468404	0	0	0	701.99	44.76	61.94	141929	740097	0.191771	<****	0	<****	<****	<****		0.793624	103102	0.0425619	0.00291485	0.0620806	1505.69	101597
SAFT10-5	0.935	0.453	892210	318.05	433.66	394.64	494.17	1005.95	886.11	1771.88	3018.93	5172.09	7737.28	11576.2	29856.7	26225.5	493327	0	0	0	476.59	30.85	42.26	136630	530449	0.257573	<****	0	<****	<****	<****		0.663716	88891.2	0.0593462	0.0121275	0.179499	2646.47	86244.7
SAFT10-6c	0.935	0.55	917526	266.34	505.7	381	538.28	1191.7	1262	2205.75	3887.08	6962.1	10456.8	15233.2	40460	36574.7	557720	0	0	4.35	574.91	39.77	54.89	136690	619407	0.220678	<****	0	<****	<****	<****		0.778391	119925	0.0545168	0.00728208	0.120748	2883.02	117042
SAFT10-7	0.935	0.214	902331	0	176.86	1.79	6.97	54.6	17.77	140.11	345.98	786.05	1369.4	2470.65	8309.46	8090.57	647972	0	0	0	225.5	14.6	9.94	21503.1	248970	0.0863685	<****	0	<****	<****	<****		0.203169	21770.2	0.0168615	0	0	240.22	21530
SAFT10-8	0.935	0.28	915291	1.87	129.56	5.86	22.14	104.05	102.86	322.89	693.03	1285.42	2144.85	3433.7	9660.95	8941.4	381613	0	0	0	105.34	6.87	7.57	17703.1	118701	0.149141	<****	0	<****	<****	<****		0.561175	26848.6	0.0334222	0.00020914	0.00579145	263.48	26585.1
SAFT10-9c	0.935	0.401	949882	1.65	124.59	40.07	120.73	454.88	346.57	1124.72	2042.58	3754.29	5715.77	8575.64	21855.5	19068.1	406994	0	0	0	148.14	9.44	13.32	32020.5	165240	0.193782	<****	0	<****	<****	<****		0.48453	63225.1	0.0514617	8.6532e-05	0.00146703	741.92	62483.2
SAFT10-10	0.935	0.439	894526	0.625	99.7	6.33	18.71	105.44	75.9	373.8	728.84	1323.18	2095.54	3275.34	8956.64	8382.42	440821	0	0	0	92.13	5.84	5.88	12990.5	100521	0.129232	<****	0	<****	<****	<****		0.382313	25442.5	0.0417344	7.45608e-05	0.00167202	230.805	25211.7
SAFT10-11	0.935	0.363	913376	0.555	104.84	5.73	18.52	94.72	85.29	283.24	582.52	1104.48	1878.03	2955.37	8596.33	7879.4	422006	0	0	0	101.75	6.49	6.33	14707.3	113344	0.129758	<****	0	<****	<****	<****		0.520715	23589	0.0329489	7.04368e-05	0.00195947	224.365	23364.7
SAFT10-12	0.935	0.354	924390	7.07	113.33	7.56	23.78	139.7	90.49	406.85	777.92	1476.32	2376.09	3762.39	10302.7	9828.28	467788	0	0	9.02	113.75	11.95	12.53	17192.5	123221	0.139526	<****	0	<****	<****	<****		0.379564	29312.4	0.0394898	0.000719353	0.0173774	291.44	29021
SAFT10-13	0.935	0.427	921657	3.27	121.58	11.81	31.41	154.36	146.54	410.24	745.11	1530.1	2506.84	3835.55	11140.5	10037.1	380490	0	0	0	181.45	11.72	13.4	30795.6	203712	0.151172	<****	0	<****	<****	<****		0.582331	30674.4	0.0368243	0.00032579	0.00797094	322.43	30352
SAFT10-14	0.935	0.166	851827	23.9	510.6	75.8	195.73	726.29	312.05	2144.11	4032.46	7412.71	12263.2	18866.9	50274	43487.8	629020	0	0	0	1259.46	80.61	106.74	241884	1.24364e+06	0.194497	<****	0	<****	<****	<****		0.250061	140326	0.0426485	0.000549579	0.0111468	1532.32	138793
SAFT10-15	0.935	0.24	902238	0.38	97.26	5.52	31.72	184.77	249.91	673.43	1241.11	2301.02	3517.44	5604.82	15879.1	14264.7	456620	0	0	0	285.05	18.11	21.27	48901.9	315659	0.15492	<****	0	<****	<****	<****		0.70847	44051.2	0.0424098	2.66392e-05	0.000564275	319.65	43731.5
SAFT10-16	0.935	0.168	925856	16.2	301.54	49.68	112.09	474.67	326.02	1258.73	2404.15	4590.48	7222.94	11588.8	33374.9	29383.3	550533	0	0	0	611	39.27	52.76	114431	647671	0.17668	<****	0	<****	<****	<****		0.421776	91103.5	0.0377149	0.000551333	0.0128701	954.18	90149.4
SAFT10-17	0.935	0.275	920698	68.48	665.66	119.74	171.3	490.92	401.01	1257.42	2386.77	4564.63	7329.23	11597	32523	29974.9	599912	0	0	2.48	791.04	51.49	71.77	167283	831128	0.201272	<****	0	<****	<****	<****		0.510399	91550.2	0.0386624	0.00228458	0.0544607	1516.1	90034.1
SAFT10-18	0.935	0.399	883592	1.15	114.83	39.97	105.12	447.74	327.6	1086.01	1961.14	3570.41	5439.75	8122.95	20796.3	17507.8	361401	0	0	0	150.73	9.66	13.8	29795.9	168458	0.176875	<****	0	<****	<****	<****		0.469801	59520.8	0.0522213	6.5685e-05	0.00105892	708.81	58812
SAFT10-19	0.935	0.394	917241	0.3	96.33	7.69	15.98	123.99	119.65	390.99	804.38	1492.36	2387.91	3838.82	10964.8	10063.5	386624	0	0	0	90.6	5.69	8.09	13786.7	100553	0.137108	<****	0	<****	<****	<****		0.543421	30306.7	0.0356587	2.98106e-05	0.000767283	244.29	30062.4
SAFT10-20	0.935	0.418	897252	1.33	123.45	44.55	114.65	492.36	314.05	1320.51	2311.08	4123.34	6065.42	8966.98	22223.6	19340.5	441857	0	0	3.58	133.76	8.54	11.88	27341.2	148443	0.184187	<****	0	<****	<****	<****		0.389481	65441.8	0.0594192	6.87677e-05	0.00100719	776.34	64665.5
SAFT10-21	0.935	0.306	894486	0	60.71	0	5.44	26.94	29.46	119.63	240.98	484.13	878.6	1521.81	4898.35	4679.5	411626	0	0	0	67.78	4.25	3.14	8028.36	75542.4	0.106276	<****	0	<****	<****	<****		0.518936	12945.5	0.0244225	0	0	93.09	12852.5
SAFT10-22	0.935	0.329	905317	0	90.32	2.07	10.94	66.32	65.73	227.4	480.43	914.64	1493	2508.3	7568.05	7017.77	395200	0	0	0	103.18	5.91	6.36	14273.1	113733	0.125496	<****	0	<****	<****	<****		0.535237	20445	0.0300474	0	0	169.65	20275.3
SAFT10-23	0.935	0.309	911526	1.54	113.28	33.87	103.97	386.31	245.25	922.03	1645.41	2914.34	4387.26	6525.56	16582.1	14441.1	406005	0	0	0	114.02	7.38	9.39	21780.7	126327	0.172416	<****	0	<****	<****	<****		0.410931	48302	0.055604	0.00010664	0.00167023	638.97	47663
SAFT10-24	0.935	0.297	903667	0	108.68	21.68	74.75	325.5	280.51	854.8	1608.16	2803.55	4221.54	6194.85	15677.7	13832.7	397241	0	0	0	109.06	6.98	9.42	21910.5	122646	0.178648	<****	0	<****	<****	<****		0.531791	46004.4	0.0545234	0	0	530.61	45473.8
SAFT10-25	0.935	0.397	922971	0.89	96.15	9.19	40.01	195.79	118.71	575.62	1010.81	1851.17	2985.57	4474.59	12657.1	11875.7	433423	0	0	0	86.54	5.41	5.44	12354.8	95240.2	0.129722	<****	0	<****	<****	<****		0.35361	35891.3	0.0454781	7.49429e-05	0.00154616	342.03	35549.2
SAFT10-26	0.935	0.397	933803	0	98	7.43	22.78	138.18	103.46	430.29	864.8	1591.62	2532.87	3992.5	10769.6	9580.14	434859	0	0	0	74.92	4.66	5.19	11902.4	83488.5	0.142563	<****	0	<****	<****	<****		0.424296	30131.7	0.039954	0	0	266.39	29865.3
SAFT10-27	0.935	0.295	925659	1.27	115.7	30.71	97.56	382.86	303.35	973.29	1821.06	3195.54	4819.59	7282.76	18727.5	16490.3	404494	0	0	2.3	124.64	7.97	11.19	25477.6	139534	0.182591	<****	0	<****	<****	<****		0.496939	54241.6	0.051971	7.70149e-05	0.00130485	628.1	53613.4
SAFT10-29	0.935	1.36	907192	999.79	1302.54	1290.14	1482.44	1731.2	2546.38	1914.85	2608.95	4284.79	6564.02	10459.8	34598.6	31665.1	729034	0	0	7.92	837.29	60.55	85.66	177597	852358	0.20836	<****	0	<****	<****	<****		1.39856	101449	0.0553448	0.0315739	0.522124	6806.11	94642.5
SAFT10-30	0.935	0.13	901790	15	216.51	14.6	29.49	87.42	69.6	243.75	514.65	1016.6	1844.17	3100.57	10889.4	10867.5	700144	0	0	3.16	527.09	33.51	29.76	71357.7	581841	0.122641	<****	0	<****	<****	<****		0.476795	28909.2	0.0223843	0.00138026	0.0615385	363.02	28546.2
SAFT10-32	0.935	0.194	935072	0.58	432.04	6.15	22.58	108.58	58.16	388.55	872.21	1815.85	3228.43	5916.78	20850	19761.2	700609	0	0	0	670.86	42.78	39.21	89460.1	718046	0.124588	<****	0	<****	<****	<****		0.283156	53461.1	0.0186355	2.93504e-05	0.00149273	569.93	52891.2
SAFT10-33	0.935	0.269	939744	1.218	129.05	5.59	16.02	100.6	117.03	293.07	593.18	1158.32	1964.03	3265.7	10042	9557.49	476214	0	0	0	389.03	24.67	22.86	52357.9	428723	0.122125	<****	0	<****	<****	<****		0.681573	27243.3	0.0291843	0.000127439	0.004156	252.478	26990.8
SAFT10-34	0.935	0.305	925704	11.97	102.34	5.4	19.52	89.95	81.32	276.79	556.94	1104.14	1778.14	2846.69	8235.78	7504.3	410499	0	0	0	103.72	6.6	6.69	15534.4	114206	0.13602	<****	0	<****	<****	<****		0.515373	22613.3	0.0336082	0.00159509	0.0432458	229.18	22384.1
SAFT10-35	0.935	0.311	939614	0	96.27	5.04	15.06	93.98	79.71	288.37	560.13	1091.1	1767.76	2830.05	8403.84	7718.84	400531	0	0	2.35	94.65	5.97	5.82	13148.2	102994	0.127661	<****	0	<****	<****	<****		0.484195	22950.2	0.0343141	0	0	210.35	22739.8
SAFT10-36	0.935	0.214	915892	0	193.13	5.71	20.87	117.51	86.2	361.16	737.21	1477.67	2427.83	4032.61	11486.8	10733.5	506352	0	0	0	205.72	13.05	13.56	31177.6	225819	0.138065	<****	0	<****	<****	<****		0.418427	31680.2	0.0314413	0	0	337.22	31343
SAFT10-37	0.935	0.398	918657	72.31	335.76	113.48	161.02	332.25	509.57	754.63	1561.26	2765.37	4580.4	7511.24	22975.5	21765.2	467292	0	0	2.92	468.88	30.59	35.58	79549.9	511897	0.155402	<****	0	<****	<****	<****		1.01766	63437.9	0.032845	0.00332228	0.0958218	1014.82	62423.1
SAFT10-39	0.935	0.403	906522	488.96	687.24	655.46	887.71	1824.95	2420.09	2693.08	4534.84	7373.41	10323.2	14985.3	37294.9	33310.3	595801	0	0	4.15	496.48	33.72	45.94	110931	540299	0.205315	<****	0	<****	<****	<****		1.09164	117479	0.0722104	0.0146789	0.181562	4544.32	112935
SAFT10-40	0.935	0.281	903440	1.09	87.49	4.49	11.99	86.59	76.85	255.55	521.57	1039.05	1756.97	2837.05	8414.87	7857.52	391282	0	0	0	69.68	4.18	4.34	9578.7	77682.1	0.123306	<****	0	<****	<****	<****		0.516621	22951.1	0.0303689	0.000138721	0.00426531	191.65	22759.4
SAFT10-41	0.935	709.94	899338	36.55	110.17	21.89	49.48	206.13	139.25	601.74	1070	2014.98	3080.69	4635.88	12111.3	11122.2	445682	0	0	0	94.27	6.51	7.82	16433.3	101300	0.162225	<****	0	<****	<****	<****		0.395385	35200.3	0.0496843	0.00328621	0.0607405	424.22	34776.1
SAFT10-42	0.935	0.33	918431	2.77	91.53	6.57	18.16	74.55	70.86	255.91	481.65	920.59	1506.41	2465.74	7251.98	6645	396535	0	0	0	86.55	5.74	5.16	11704.5	94415.6	0.123968	<****	0	<****	<****	<****		0.513019	19791.7	0.0352883	0.000416855	0.0108241	193.58	19598.1
SAFT10-43	0.935	0.297	933189	1.01	89.68	13.43	40.92	178.74	163.64	445.23	841.15	1531.18	2360.42	3763.95	10783.1	9663.44	412748	0	0	0	120.59	7.68	7.88	18246.9	132515	0.137698	<****	0	<****	<****	<****		0.580078	29875.9	0.0412897	0.000104518	0.00226849	323.78	29552.1
SAFT10-44	0.935	0.311	936214	0.979	103.54	5.07	12.81	84.78	81.33	310.9	584.87	1110.71	1788.31	2870.78	8398.14	7800.74	405982	0	0	2.56	97.79	6.2	5.98	13511.7	107840	0.125294	<****	0	<****	<****	<****		0.500949	23153	0.0370201	0.000125501	0.00314892	207.179	22945.8
SAFT10-45	0.935	0.362	934588	0	105.13	6.98	25.06	147.63	97.03	346.24	675.97	1227.31	2012.72	3227.97	9395.74	8517.76	391437	0	0	2.76	108.17	6.83	7.14	16185.8	120287	0.13456	<****	0	<****	<****	<****		0.429171	25785.5	0.0368507	0	0	284.8	25500.7
SAFT10-46	0.935	0.338	950175	0	79.72	2.96	14.23	64.86	74.29	204.21	428.45	839.71	1381.62	2291.69	6921.38	6189.54	401778	0	0	0	111.57	7.26	6.53	14918.7	123835	0.120473	<****	0	<****	<****	<****		0.645511	18492.7	0.0295042	0	0	161.77	18330.9
SAFT10-47	0.935	0.334	932714	0.61	94.86	6.38	21.03	113.62	95.56	314.89	675.02	1238.96	2031.61	3307.15	9594.88	8623.82	392955	0	0	3.13	100.73	5.92	6.71	15050.5	109145	0.137894	<****	0	<****	<****	<****		0.505207	26118.4	0.0328185	7.07343e-05	0.00193718	236.5	25881.9
SAFT10-48	0.935	0.269	925016	0.84	113.98	7.81	19.8	106.08	104.4	339.19	644.07	1293.67	2029.8	3397.75	9595.4	8755.81	377775	0	0	0	117.51	7.66	7.75	17778.6	130181	0.136568	<****	0	<****	<****	<****		0.550379	26408.6	0.0353492	9.59363e-05	0.00247649	248.51	26160.1
SAFT10-49	0.935	0.325	921971	0.389	110.76	4.3	20.32	117.67	78.28	304.34	686.53	1269.67	2045.72	3215.07	9276.03	8450.47	448501	0	0	2.72	100.97	6.31	6.55	14722.9	110146	0.133667	<****	0	<****	<****	<****		0.413655	25579.5	0.0328093	4.60329e-05	0.00127818	253.439	25326.1
SAFT10-4c	0.935	0.431	878513	96.59	307.49	169.17	265.71	666.73	808.31	1555.88	2921.38	5385.66	8181.8	13050.8	36555.7	33137.2	468404	0	0	0	701.99	44.76	61.94	141929	740097	0.191771	<****	0	<****	<****	<****		0.793624	103102	0.0425619	0.00291485	0.0620806	1505.69	101597
SAFT10-4r	0.935	0.443	916677	150.47	738.5	214.51	271.49	613.58	537.05	1119.3	2116.52	4122.91	6423.72	10237.8	29298	26578.9	641691	0	0	3.5	600.65	38.62	46.34	108596	637207	0.170425	<****	0	<****	<****	<****		0.648046	82422.8	0.038204	0.00566125	0.134432	1988.55	80434.3
SAFT10-50	0.935	0.308	913645	0	112.65	2.99	14.42	94.01	71.26	296.01	605.42	1158.29	1902.06	3034.24	8709.95	7712.61	444722	0	0	2.89	88.48	5.67	5.41	12220	96573.1	0.126536	<****	0	<****	<****	<****		0.427175	23713.9	0.0339853	0	0	224.07	23489.8
SAFT10-51	0.935	0.35	943229	0	103.47	7.24	22.43	138.4	91.48	388.22	813.89	1476.5	2430.08	3782.88	10331.6	9614.76	456065	0	0	0	86.55	5.54	5.35	12361.1	95240.5	0.129788	<****	0	<****	<****	<****		0.394656	29201	0.0375758	0	0	271.54	28929.4
SAFT10-52	0.935	0.279	935433	0	72.53	2.71	5.68	43.94	52.62	146.1	342.4	683.4	1085	1858.46	5907.54	5341.6	411152	0	0	0	60.76	3.89	3.22	7313.28	68041.1	0.107483	<****	0	<****	<****	<****		0.656743	15542	0.0247311	0	0	124.86	15417.1
SAFT10-3r	0.935	0.206	927274	1.61	343.27	7.43	24.73	126.21	60.31	411.61	873.39	1852.51	3034.68	5211.09	15480.2	14655	620898	0	0	0	291.73	18.06	20.84	44973.7	308183	0.145932	<****	0	<****	<****	<****		0.264606	42082.1	0.0265894	0.00010986	0.00391147	503.25	41578.9
SAFT10-4r	0.935	0.443	916677	150.47	738.5	214.51	271.49	613.58	537.05	1119.3	2116.52	4122.91	6423.72	10237.8	29298	26578.9	641691	0	0	3.5	600.65	38.62	46.34	108596	637207	0.170425	<****	0	<****	<****	<****		0.648046	82422.8	0.038204	0.00566125	0.134432	1988.55	80434.3
SAFT10-6r	0.935	0.276	899538	86.16	456.54	114.42	166.63	401.7	498.49	777.47	1474.7	2726.18	4382.59	6981.88	20243.3	19274.8	623366	0	0	0	521.45	34.2	38.18	89415.7	577222	0.154907	<****	0	<****	<****	<****		0.891998	57584.9	0.0384063	0.00447008	0.110821	1225.45	56359.4
SAFT10-7r	0.935	0.192	903872	13.06	491.57	25.01	35.82	171.3	101.2	446.19	1033.17	2118.74	3818.51	6799.85	23112.5	22491.3	676773	0	0	0	770.27	48.97	52.83	122253	803081	0.152231	<****	0	<****	<****	<****		0.366051	60658.3	0.0193051	0.000580668	0.02927	736.76	59921.5
SAFT10-9r	0.935	0.366	856685	0	88.82	7.3	25.76	136.2	125.75	356.35	696.5	1311.97	2122.9	3278.16	10211.6	9091.05	363918	0	0	0	95.97	6.25	6.28	13499.3	107325	0.125779	<****	0	<****	<****	<****		0.570796	27452.3	0.0348967	0	0	258.08	27194.2
SAFT10-median	0.935	0.325	916677	1.15	113.98	7.69	25.06	139.7	117.03	406.85	813.89	1530.1	2430.08	3838.82	10964.8	10063.5	441857	0	0	0	120.59	7.97	9.94	21780.7	132515	0.164365	#NUM!	0	#NUM!	#NUM!	#NUM!		0.490887	30452.7	0.0371052	0.000114274	0.00282659	287.58	30165.1
mean	0.935	14.2588	914731	54.7433	225.082	82.181	125.862	330.571	318.709	748.57	1392.76	2556.75	3999.01	6265.95	17470.6	15819	470748	0	0	1.23725	287.382	18.7251	23.0682	53275.1	307853	0.153219	#DIV/0!	0	#DIV/0!	#DIV/0!	#DIV/0!		0.640688	49389.7	0.0428475	0.00346061	0.0731305	818.439	48571.3
std	4.48508e-16	99.3633	19427	162.536	233.634	210.468	252.094	398.45	508.767	662.589	1155.3	2035.79	3060.57	4667.27	12277	10895.1	94174.8	0	0	2.0658	279.429	18.3054	25.5926	59347.9	287633	0.0359631	#DIV/0!	0	#DIV/0!	#DIV/0!	#DIV/0!		0.990169	36519.6	0.05397	0.0149183	0.245304	1257.18	35262.4
max	0.935	709.94	950175	999.79	1302.54	1290.14	1482.44	1824.95	2546.38	2693.08	4842.89	8998.33	13777	21996.3	56855.8	51104.4	729034	0	0	9.02	1259.46	80.61	106.74	241884	1.24364e+06	0.257573	0	0	0	0	0		1.14861	169714	0.0473668	0.0195637	0.371244	6899.86	162814
min	0.935	0.13	851827	0	60.71	0	5.44	26.94	17.77	119.63	240.98	484.13	878.6	1521.81	4898.35	4679.5	361401	0	0	0	60.76	3.89	3.14	7313.28	68041.1	0.0863685	0	0	0	0	0		0.313017	12933.9	0.0244225	0	0	93.09	12840.8

## Sheet: detrital
Element	Si29	Ti49	Zr91	La139	Ce140	Pr141	Nd146	Sm147	Eu153	Gd157	Tb159	Dy163	Ho165	Er167	Tm169	Yb172	Lu175	Hf178	Hg202	Hg201	Pb204	Pb206	Pb207	Pb208	Th232	U238	Pm147	Hg204	Po208	U232	Pu238		Eu/Eu*	total REE	Gd/Yb	La/Lu	La/Gd	ƩLREE	ƩHREE		Smith, T.M., Saylor, J.E., Lapen, T.J., Hatfield, K., and Sundell, K.E., 2022, Identifying sources of non-unique detrital age distributions through integrated provenance analysis: An example from the Paleozoic Central Colorado Trough: Geosphere, v. 18, https://doi.org/10.1130/GES02541.1
2SMBT4-001	0.935	1.1	77608.9	14.9	28.16	16.95	23.19	117.29	153.39	438.51	583.25	770.51	794.37	882.17	1139.9	1495.01	1407.55	37403.3	0	<****	0.4	12.88	1.03	1.49	8453.38	24715.3	<****	0	<****	<****	<****		0.676358	6457.6	0.384692	0.00996649	0.0339787	200.49	6257.11
2SMBT4-003	0.935	0.0164	88996	0	10.19	0.31	1.423	5.35	3.63	21.89	45.06	80.81	155.11	276.64	482.45	722.62	755.69	38689	0	<****	0	12.67	0.83	0.71	1502.42	13308.1	<****	0	<****	<****	<****		0.335434	1805.48	0.0453726	0	0	17.273	1788.21
2SMBT4-006	0.935	0.0163	85284.1	0	22.84	4.12	14.21	61.58	18.03	169.03	316.56	529.02	803.16	1237.38	1780.15	2380.58	2318.03	47415.2	0	<****	0	28.27	1.89	2.35	4802.49	29512.1	<****	0	<****	<****	<****		0.176723	7336.66	0.0949527	0	0	102.75	7233.91
2SMBT4-007	0.935	0.0147	81911.2	0.115	33.19	5.75	14.9	73.73	24.18	186.51	360.37	612.69	959.75	1481	2211.55	2958.69	3020.6	54567.2	0	<****	0	55.56	3.63	3.95	8773.15	57577.6	<****	0	<****	<****	<****		0.206197	8922.43	0.0843345	3.88686e-05	0.000616589	127.685	8794.74
2SMBT4-008	0.935	0.0198	79272.1	0.259	14.81	1.311	3.82	19.62	10.59	62.85	125.08	204.87	318.96	471.74	723.07	1042.3	1012.88	40767	0	<****	0	15.13	1.02	1.08	1988.41	14311.8	<****	0	<****	<****	<****		0.301574	2999.28	0.086921	0.000248489	0.00412092	39.82	2959.46
2SMBT4-010	0.935	0.027	76291.8	0.495	11.61	0.633	1.118	8.23	10.95	35.33	49.45	87.57	136.97	242.65	398.17	614.98	722.4	55054.6	0	<****	0.47	24.43	2.03	1.38	1951.08	23615.8	<****	0	<****	<****	<****		0.642159	1598.16	0.0887309	0.000804904	0.0140108	22.086	1576.07
2SMBT4-011	0.935	0.045	81782.4	0.348	13.5	2.322	4.84	23.68	3.16	58.49	116.03	209.89	386.92	664.74	1077.59	1588.34	1766.59	38191.1	0	<****	0	20.92	1.43	1.06	1812.48	20914.3	<****	0	<****	<****	<****		0.0849093	4149.85	0.0542785	0.000219097	0.00594973	44.69	4105.16
2SMBT4-013	0.935	0.0169	82708.5	0.094	11.7	1.029	2.87	15.29	5.38	53.39	104.71	174.57	275.48	428.26	639.84	957.36	991.81	46628.4	0	<****	0	10.44	0.68	0.63	1273.84	10830.9	<****	0	<****	<****	<****		0.188299	2669.97	0.0834427	9.81867e-05	0.00176063	30.983	2638.99
2SMBT4-015	0.935	0.0174	83945.2	0	30.22	1.916	5.7	29.14	9.44	100.52	209.75	354.39	578.11	946.75	1481.34	2083.32	2132.64	49185.3	0	<****	0	43.71	2.84	2.09	4110.47	43134.2	<****	0	<****	<****	<****		0.174422	5830.6	0.0678575	0	0	66.976	5763.62
2SMBT4-018	0.935	0.27	63717.7	6.46	21.51	5.41	7.88	26.01	15.44	80.73	142.69	239.1	367.02	550.49	803.99	1072.43	1130.1	32192.1	0	<****	0.46	24.58	2.22	3.45	5814.93	23834.9	<****	0	<****	<****	<****		0.336945	3339.16	0.100412	0.0060237	0.0800198	67.27	3271.89
2SMBT4-019	0.935	0.028	81920.6	0.388	19.13	5.42	16.12	67.7	27.86	195.84	345.25	554.23	803.16	1201.55	1702.99	2232.11	2224.14	41459.5	0	<****	0.32	21.15	1.41	2	4240.06	21750.3	<****	0	<****	<****	<****		0.241956	7171.75	0.114998	0.000173827	0.00198121	108.758	7062.99
																																						0	0
Element	Si29	Ti49	Zr91	La139	Ce140	Pr141	Nd146	Sm147	Eu153	Gd157	Tb159	Dy163	Ho165	Er167	Tm169	Yb172	Lu175	Hf178	Hg202	Hg201	Pb204	Pb206	Pb207	Pb208	Th232	U238	Pm147	Hg204	Po208	U232	Pu238		Eu/Eu*	total REE	Gd/Yb	La/Lu	La/Gd	0	0
1SMBT4-006	0.935	0.032	81583.2	0	8.37	2.297	6.62	71.15	77.72	164.55	252.98	326.59	389.16	495.67	743.06	942.62	889.71	39304.3	0	<****	0	8.46	0.58	0.8	2039.24	9577.63	<****	0	<****	<****	<****		0.718284	3480.79	0.221449	0	0	88.437	3392.35
1SMBT4-012	0.935	0.03	81481.3	0	12.31	1.429	4.67	25.41	12.05	81.23	136.4	230.77	346.26	506.94	769.72	1025.85	1014.13	41032.2	0	<****	0	11.21	0.75	0.81	1549.47	11283.9	<****	0	<****	<****	<****		0.265232	3153.04	0.105532	0	0	43.819	3109.22
																																						0	0
Element	Si29	Ti49	Zr91	La139	Ce140	Pr141	Nd146	Sm147	Eu153	Gd157	Tb159	Dy163	Ho165	Er167	Tm169	Yb172	Lu175	Hf178	Hg202	Hg201	Pb204	Pb206	Pb207	Pb208	Th232	U238	Pm147	Hg204	Po208	U232	Pu238		Eu/Eu*	total REE	Gd/Yb	La/Lu	La/Gd	0	0
1SMST9-001	0.935	0.0213	88347.8	0	30.25	1.563	5.92	25.53	9.45	85.98	155.96	283.27	444.68	707.31	1045.59	1389.52	1433.49	42015.3	0	<****	0	17.44	1.18	0.82	1856.85	17801.6	<****	0	<****	<****	<****		0.201701	4185.02	0.0822311	0	0	63.263	4121.76
1SMST9-002	0.935	0.0227	85967.7	0.168	19.93	1.193	3.36	16.21	5.73	56.52	100.38	183.69	286.24	462.96	719.03	980.5	1026.28	47088.7	0	<****	0	15.54	1.01	0.79	1924.89	15972.5	<****	0	<****	<****	<****		0.189305	2835.91	0.0786059	0.000171341	0.0029724	40.861	2795.05
1SMST9-003	0.935	0.0117	85499.5	0	21.81	0.485	1.98	14.2	4.63	48.98	95.86	180.31	308.79	495.39	754.33	1067.39	1093.53	42282.3	0	<****	0	6.85	0.447	0.32	719.98	7019.43	<****	0	<****	<****	<****		0.175561	2994.15	0.0649318	0	0	38.475	2955.68
1SMST9-004	0.935	0.0183	87750.6	0	21.29	0.344	2	12.45	3.32	47.69	93.85	181.89	300.99	510.7	812.19	1182.96	1273.02	57450.3	0	<****	0	12.24	0.79	0.62	1398.89	12671.7	<****	0	<****	<****	<****		0.136251	3169.67	0.0587178	0	0	36.084	3133.59
1SMST9-005	0.935	0.008	88234.8	0.252	45.35	1.638	4.4	26.5	8.89	104.54	188.42	373.9	630	1063.42	1698.68	2412.64	2541.02	64805.2	0	<****	0	55.66	3.63	2.76	6413.75	56512.5	<****	0	<****	<****	<****		0.168903	6558.63	0.0615419	0.00010445	0.00241056	78.14	6480.49
1SMST9-006	0.935	0.025	86484.2	0	18.86	1.668	5.04	22.7	3.53	73.85	125.65	225.12	363.53	545.87	845.46	1172.9	1264.91	38976.9	0	<****	0	8.39	0.55	0.52	1171.77	8660.89	<****	0	<****	<****	<****		0.0862157	3404.18	0.0873489	0	0	48.268	3355.91
1SMST9-007	0.935	0.0107	81675.1	4.13	25.83	4.1	9.04	34.04	6.42	121.04	201.36	367.12	599.86	923.87	1323.64	1816.65	1894.4	41819.1	0	<****	0	23.1	1.49	1.05	2402.41	23227.7	<****	0	<****	<****	<****		0.100017	5437.1	0.0914448	0.00227342	0.034121	77.14	5359.96
1SMST9-008	0.935	0.0087	85229.4	328.81	328.6	317.89	283.18	248.24	52.68	460.12	732.92	1263.32	1943.08	2710.87	3697.95	4488.49	4255.92	36811.6	0	<****	0.38	38.73	2.66	2.01	4307.44	39360.4	<****	0	<****	<****	<****		0.155874	16856.2	0.124426	0.0732563	0.714618	1506.72	15349.4
1SMST9-009	0.935	0.0102	86817.5	0.212	30.12	7.51	19.1	73.57	22.57	193.75	340.01	557.66	841.76	1254.05	1794.32	2297.47	2210.65	45082.6	0	<****	0	24.3	1.59	1.44	3295.01	25459.1	<****	0	<****	<****	<****		0.189043	7432.1	0.10798	9.22754e-05	0.00109419	130.512	7301.59
1SMST9-010	0.935	0.0272	84608.5	0.068	18.6	0.818	3.29	16.83	4.83	55.35	103.87	189.18	305.3	481	773.83	1094.95	1140.62	51339.2	0	<****	0	11.48	0.77	0.75	1714.78	11957.7	<****	0	<****	<****	<****		0.158251	3047.92	0.0715273	6.21033e-05	0.00122855	39.606	3008.31
1SMST9-011	0.935	0.0126	83371.3	0.094	45.48	2.423	7.59	39.87	15.13	113.17	218.18	391.85	583.6	891.73	1281.65	1649.42	1547.06	43372.8	0	<****	0	31.75	2.05	1.58	3634.23	32209	<****	0	<****	<****	<****		0.225242	5240.19	0.0883002	5.69897e-05	0.000830609	95.457	5144.73
1SMST9-012	0.935	0.0266	89117.8	26.74	58.33	23.85	25.82	44.41	12.54	100.11	170.84	305.23	485.88	748.44	1135.13	1460.72	1534.51	41779.1	0	<****	0	22.29	1.39	1.49	3314.62	22625.5	<****	0	<****	<****	<****		0.18807	4598.04	0.0881925	0.018306	0.267106	179.15	4418.89
1SMST9-013	0.935	0.0162	86106.5	0	21.94	0.831	4.32	18.86	5.49	70.71	142.38	269.83	435.97	717.36	1090.87	1516.71	1695.28	50382	0	<****	0	13.34	0.88	0.84	1934.8	14146.4	<****	0	<****	<****	<****		0.150335	4295.27	0.0648198	0	0	45.951	4249.32
1SMST9-014	0.935	0.0078	88466.1	0.301	16.51	1.357	4.68	34.24	8.48	118.52	217.14	389.74	626.05	958.83	1420.84	1862.95	2034.42	52471.1	0	<****	0	7.8	0.516	0.62	1433.44	8241.69	<****	0	<****	<****	<****		0.133117	5659.64	0.0834154	0.000161572	0.00253966	57.088	5602.55
1SMST9-015	0.935	0.0055	85740.2	0.247	31.59	5.46	15.81	70.27	17.75	188.85	354.87	653.63	1120.29	1697.8	2537.03	3337.09	3367.02	51437.7	0	<****	0	52.17	3.37	2.92	6792.03	53275.9	<****	0	<****	<****	<****		0.154083	10030.7	0.0744374	7.40166e-05	0.00130792	123.377	9907.31
1SMST9-016	0.935	0.0029	89277.3	0	112.3	6.94	24.16	169.68	78.63	655.98	1319.61	2409.22	3760.03	5480.29	7176.48	8259.78	7143.41	39741.8	0	<****	0	91.69	5.93	5.79	13856	95271.1	<****	0	<****	<****	<****		0.235683	29453.1	0.0914069	0	0	313.08	29140
1SMST9-017	0.935	0.0125	89468	0	38.78	2.77	7.7	42.7	7.08	162.58	295.7	519.4	839.56	1237.33	1743.98	2269.68	2313.76	41180.4	0	<****	0	17.88	1.15	1.29	2796.04	18119.6	<****	0	<****	<****	<****		0.0849739	7167.26	0.0932235	0	0	91.95	7075.31
1SMST9-018	0.935	0.0097	83511.9	0.103	37.5	1.392	5.03	28.73	10.34	90.69	185.54	340.12	574.76	902.68	1345.66	1829.83	1869.5	41022.3	0	<****	0	25.4	1.69	1.45	3281.69	26492.4	<****	0	<****	<****	<****		0.202569	5352.38	0.0673944	5.62894e-05	0.00113574	72.755	5279.62
1SMST9-019	0.935	0.0266	87867.7	0.18	15.25	3.89	9.99	35.99	11.82	98.29	178.68	318.07	498.15	777.3	1157.53	1600.73	1729.95	50737.1	0	<****	0	11.96	0.78	0.83	1886.53	12201.8	<****	0	<****	<****	<****		0.198734	4705.87	0.0849136	0.000112449	0.00183132	65.3	4640.57
1SMST9-020	0.935	0.023	85290	0.545	30.98	8.67	23.5	98.41	25.64	237.49	386.97	654.72	939.86	1341.22	1949.46	2550.12	2495.27	41405.1	0	<****	0	24.27	1.58	1.94	4286.44	25313.7	<****	0	<****	<****	<****		0.167716	8247.58	0.121823	0.000213715	0.00229483	162.105	8085.48
1SMST9-021	0.935	0.008	86972.5	0	23.34	1.56	5.07	32.6	11.58	119.77	230.32	412.77	677.87	1106.83	1669.35	2284.87	2413.19	56705.5	0	<****	0	19.81	1.3	1.34	3072.29	20468.7	<****	0	<****	<****	<****		0.185321	6575.93	0.0717465	0	0	62.57	6513.36
1SMST9-022	0.935	0.0262	88059.4	0.724	18.81	5.4	12.44	42.57	12.22	110.37	197.54	337.34	535.62	814.44	1178.89	1593.49	1649.93	50062.7	0	<****	0	18.09	1.18	1.09	2522.22	18449.2	<****	0	<****	<****	<****		0.178276	4859.85	0.093622	0.000454349	0.00655975	79.944	4779.91
1SMST9-023	0.935	0.0174	88769.2	0.613	25.3	6.67	19.75	69.08	18.64	195.65	344.65	627.39	1006.33	1563.1	2323.42	3114.92	3204.76	47088.4	0	<****	0	35.55	2.3	2.66	6177.29	36320.8	<****	0	<****	<****	<****		0.160336	9315.51	0.0842078	0.000196795	0.00313315	121.413	9194.1
1SMST9-024	0.935	0.0083	89680.9	0	42.3	2.016	8.04	44.53	19.63	143.95	272.03	507.88	810.1	1369.29	2188.39	3120.3	3311.93	66073.5	0	<****	0	35.53	2.31	2.78	6489.82	37654.6	<****	0	<****	<****	<****		0.245182	8528.46	0.065779	0	0	96.886	8431.57
1SMST9-025	0.935	0.0201	89622.7	0.289	23.93	1.759	5.06	24.49	10.29	72.23	133.58	229.05	347.31	533.43	790.02	1021.5	1052.38	44284	0	<****	0	13.19	0.91	0.76	2111.96	14275.4	<****	0	<****	<****	<****		0.24466	3192.94	0.0914281	0.000282917	0.00400111	55.528	3137.41
1SMST9-026	0.935	0.0061	86299.4	0	18.56	1.862	7.09	43.92	7.79	136.3	278.64	489.98	818.26	1298.11	1884.06	2478.02	2577.58	52809	0	<****	0	15.88	1.04	0.81	1899.4	16739.2	<****	0	<****	<****	<****		0.100684	7462.59	0.0723438	0	0	71.432	7391.16
1SMST9-027	0.935	0.0175	87409	0.108	16.38	1.305	4.23	26.24	8.21	87.19	158.09	285.01	474.37	734.03	1090.58	1439.09	1545.1	43922.8	0	<****	0	16.88	1.08	0.82	1912.75	17502.7	<****	0	<****	<****	<****		0.171644	4324.83	0.0799483	7.50474e-05	0.00123867	48.263	4276.57
1SMST9-028	0.935	0.0092	89235.2	0	32.36	0.795	2.74	18.33	11.55	79.83	158.46	313.76	542.19	873.76	1303.49	1691.27	1622.66	56515.9	0	<****	0	43.97	2.87	1.93	4419.29	45522.3	<****	0	<****	<****	<****		0.301938	5028.53	0.0612433	0	0	54.225	4974.31
1SMST9-030	0.935	0.0078	87028.6	0.226	35.14	7.2	22.08	107.44	20.56	363.7	656.83	1120.85	1733.65	2568.57	3535.59	4416.39	4614.28	46636.5	0	<****	0	42.54	2.74	2.54	5930.83	43515.6	<****	0	<****	<****	<****		0.104008	14588.2	0.102868	5.1173e-05	0.000621391	172.086	14416.1
1SMST9-032	0.935	0.0259	83804.4	0.494	25.6	2.376	6.53	32.33	13.79	94.78	176.61	305.67	473.31	732.12	1040.37	1331.56	1318.6	43918.1	0	<****	0	12.26	0.84	0.71	1922.01	13134.8	<****	0	<****	<****	<****		0.249117	4235.54	0.0911022	0.000370993	0.00521207	67.33	4168.21
1SMST9-033	0.935	0.031	84590.3	0.195	16	5.18	15.11	60.31	20.44	160.07	283	480.68	730.66	1117.71	1647.89	2184.93	2298.1	42484.4	0	<****	0	13.17	0.86	1.09	2496.95	13618.7	<****	0	<****	<****	<****		0.208033	6722.17	0.0971363	8.92477e-05	0.00121822	96.795	6625.38
																																						0	0
Element	Si29	Ti49	Zr91	La139	Ce140	Pr141	Nd146	Sm147	Eu153	Gd157	Tb159	Dy163	Ho165	Er167	Tm169	Yb172	Lu175	Hf178	Hg202	Hg201	Pb204	Pb206	Pb207	Pb208	Th232	U238	Pm147	Hg204	Po208	U232	Pu238		Eu/Eu*	total REE	Gd/Yb	La/Lu	La/Gd	0	0
SMST112-003	0.935	0.278	84804.9	163.66	166.65	125.84	116.95	117.15	91.12	215.97	365.53	603.77	898.6	1365.11	2012.2	2659.99	2909.11	52799	0	<****	0.41	20.01	1.57	1.92	5601.05	21999.4	<****	0	<****	<****	<****		0.572857	8902.54	0.10733	0.0615265	0.75779	690.25	8212.29
SMST112-004	0.935	0.032	85783.9	4.58	93.12	14.85	19.97	61.21	34.14	128.38	233.38	425.56	638.75	932.6	1353.15	1746.16	1784.63	55232.8	0	<****	0	38.54	2.55	1.9	6636.42	43280.4	<****	0	<****	<****	<****		0.385127	5685.85	0.0948749	0.0026229	0.0356753	193.73	5492.12
SMST112-005	0.935	0.0097	83460.6	76.44	97.06	64.88	66.3	81.98	12.66	194.62	333.26	612.46	959.25	1392.79	1957.26	2586.58	2592.58	38054	0	<****	0	25.61	1.7	1.08	2492.08	25663.4	<****	0	<****	<****	<****		0.100227	8435.54	0.0994349	0.0295525	0.392765	386.66	8048.88
SMST112-006	0.935	0.0174	88220.8	0.266	89.37	10.91	27.85	107.39	39.53	405.88	803.17	1536.4	2558.15	3857.89	5343.07	6728.76	7024.31	42523.9	0	<****	0	75.91	4.94	7.42	18317.6	78385.9	<****	0	<****	<****	<****		0.189342	21508.6	0.0759638	3.95318e-05	0.000655366	235.786	21272.8
SMST112-007	0.935	0.0142	90698.5	0.193	16.92	0.479	1.593	13.32	6.77	58.05	126.01	230.33	396.16	621.76	959.08	1297.48	1360.59	51667.3	0	<****	0	13.32	0.9	0.47	1139.11	14217.9	<****	0	<****	<****	<****		0.243464	3728.14	0.0605268	0.00014875	0.00332472	32.505	3695.64
SMST112-008	0.935	0.0184	87521	0.176	14.42	0.422	1.718	10.41	5.85	35.93	70.08	135.72	218.69	348.66	548.79	794.92	855.81	52609.2	0	<****	0	8.06	0.543	0.38	894.05	8340.5	<****	0	<****	<****	<****		0.302484	2185.79	0.0654713	0.000221406	0.00489841	27.146	2158.64
SMST112-009	0.935	0.037	89884	0.187	18.84	1.756	3.82	17.66	8.58	60.05	111.62	208.7	333.12	516.01	805.77	1122.59	1182.09	49476.6	0	<****	0	12.16	0.8	0.67	1642.5	13034.5	<****	0	<****	<****	<****		0.263473	3208.7	0.074525	0.000166579	0.00311407	42.263	3166.44
SMST112-010	0.935	0.0285	88676.8	0.503	14.39	4.48	12.68	43.04	4.12	109.14	166.61	274.7	413.41	599.2	877.28	1208.19	1356.74	39627.4	0	<****	0	3.97	0.293	0.37	835.71	4136.33	<****	0	<****	<****	<****		0.0601131	3727.74	0.124407	0.000416325	0.00460876	75.093	3652.65
SMST112-011	0.935	0.037	88121	0.181	11.46	2.271	7.9	28.88	3.86	81.55	122.77	204.01	298.11	458.06	668.26	962.98	1082.36	37994.9	0	<****	0	4.2	0.269	0.31	746.29	4409.7	<****	0	<****	<****	<****		0.0795384	2850.29	0.122033	0.000187958	0.0022195	50.692	2799.6
SMST112-012	0.935	0.0075	82555.9	0	31.54	3.5	11.43	54.84	17.82	174.39	326.77	606.79	1001.6	1527.81	2182.15	2843.21	2972.96	43916.9	0	<****	0	27.25	1.76	1.36	3225.63	28921.2	<****	0	<****	<****	<****		0.182221	8781.85	0.0799166	0	0	101.31	8680.54
SMST112-013	0.935	0.033	85400.4	8.06	61.25	13.14	16.6	55.57	29.52	158.65	310.6	509.77	838.06	1243.21	1846.39	2358.39	2350.72	60787.1	0	<****	0	28.72	2.08	1.94	5256.74	31632	<****	0	<****	<****	<****		0.314395	7449.21	0.0859244	0.00341759	0.0508037	154.62	7294.59
SMST112-014	0.935	0.0129	83860.1	1.598	31.14	4.7	10.54	45.9	16.94	163.88	307.71	557.44	814.09	1224.05	1826.12	2455.08	2392.56	45877.4	0	<****	0	24.4	1.58	1.16	3368.7	26009.1	<****	0	<****	<****	<****		0.195319	7459.19	0.0897422	0.000650895	0.00975104	93.878	7365.31
SMST112-015	0.935	0.0076	85476.1	0.205	35.35	2.52	8.89	48.6	12.43	167.02	347.91	613.98	1008.41	1548.01	2402.97	3063.93	3125.74	44706.9	0	<****	0	37.63	2.41	1.89	4426.83	39397.7	<****	0	<****	<****	<****		0.137965	9260.23	0.0695057	6.69075e-05	0.0012274	95.565	9164.66
SMST112-016	0.935	0.0082	84222.5	0.175	50.66	3.86	10.51	55.52	13.75	196.23	353.79	642.34	1048.36	1602.85	2342.04	3055.23	3108.74	39026.1	0	<****	0	30.25	1.95	1.75	4085.06	31348.2	<****	0	<****	<****	<****		0.131733	9375.31	0.0837859	5.72788e-05	0.000891811	120.725	9254.59
SMST112-017	0.935	0.0035	89032.5	0.149	64.54	1.975	5.5	39.91	21.29	171.71	319.1	624.33	1018.09	1601.74	2385.99	3047.73	2928.46	51127.8	0	<****	0	49.17	3.21	2.08	4960.03	50584	<****	0	<****	<****	<****		0.25718	9302.05	0.0719659	4.88888e-05	0.000867742	112.074	9189.98
SMST112-019	0.935	0.0129	84935.6	0.48	18.83	2.492	8.64	40.05	9.68	128.96	243.01	430	673.21	1031.37	1466.6	1873.47	1824.44	55003.5	0	<****	0	24.82	1.63	0.99	2308.51	26215.6	<****	0	<****	<****	<****		0.134693	5926.79	0.0879313	0.000256209	0.00372208	70.492	5856.3
SMST112-020	0.935	0.077	75083.4	2.12	75.22	6.08	11.51	44.12	16.35	124.79	232.43	428.2	683.97	1058.52	1600.68	2133.12	2186.95	43707.5	0	<****	0	70.45	4.72	6.44	14748.6	71308.6	<****	0	<****	<****	<****		0.220349	6417.11	0.0779606	0.000993849	0.0169885	139.05	6278.06
SMST112-021	0.935	0.0064	81892.1	0	119.48	5.79	22.72	157.06	73.24	582.41	1126.33	2059.14	3144.21	4613.39	6090.11	7461.12	6557.26	40460	0	<****	0	85.1	5.52	5.43	12906.6	86044.4	<****	0	<****	<****	<****		0.242159	25455	0.0956321	0	0	305.05	25150
SMST112-022	0.935	0.0098	82847.6	0.216	23.51	1.452	4.8	23.84	9	81.85	156.01	277.56	478.96	792.79	1211.91	1718.05	1861.16	36279.7	0	<****	0	27.07	1.72	0.62	1434.01	27542.5	<****	0	<****	<****	<****		0.203742	4779.95	0.067538	0.000125724	0.00263897	53.818	4726.13
SMST112-023	0.935	0	84258.4	0.112	35.74	3.2	9.61	55.38	30.83	188.73	366.31	645.63	1064.6	1625.52	2357.14	3131.53	2951.57	51500.2	0	<****	0	35.53	2.32	2	4664.16	37017.2	<****	0	<****	<****	<****		0.301562	9514.33	0.0800674	3.57653e-05	0.00059344	104.042	9410.29
SMST112-024	0.935	0.0108	88449.2	0.154	40.48	1.017	4.48	25.92	6.76	106.52	227.74	452.04	753.64	1274.88	1892.48	2571.78	2590	55665.4	0	<****	0	53.99	3.49	2.12	4811.08	54268.1	<****	0	<****	<****	<****		0.128651	7357.89	0.0562859	5.98807e-05	0.00144574	72.051	7285.84
SMST112-025	0.935	0	87739.3	2.79	38.86	5.45	12.82	52.12	19.15	175.78	398.81	745.15	1271.76	2060.15	3091.8	4037.73	4033.97	49404.1	0	<****	0	52.61	3.45	2.53	6038.38	54261.8	<****	0	<****	<****	<****		0.20007	11912.4	0.0568536	0.000690982	0.0158721	112.04	11800.3
SMST112-026	0.935	0.0142	83621.7	0.474	52.21	3.17	9.37	48.38	30.01	152.54	326.68	627.48	1058.9	1929.54	3515.63	5526.88	6144.76	69776.8	0	<****	0	26.9	1.76	6.14	14079.1	27358	<****	0	<****	<****	<****		0.349334	13281.3	0.0433891	8.57627e-05	0.00310738	113.604	13167.7
SMST112-029	0.935	0.012	81913.5	8.3	185.62	27.07	28.82	96.64	70.14	241.17	481.42	815.77	1241.54	1780.56	2366.04	2918.25	2522.51	31347.8	0	<****	0	68.54	4.41	3.63	8024.88	68708.4	<****	0	<****	<****	<****		0.459437	10261.3	0.10193	0.00284417	0.0344156	346.45	9914.89
SMST112-030	0.935	0.0272	87893.6	0.588	8.97	0.341	1.679	12.89	6.88	49.36	93.49	167.37	286.81	465.17	733.4	1030.04	1135.27	50433.8	0	<****	0	7.79	0.495	0.37	890.31	8231.26	<****	0	<****	<****	<****		0.272756	2856.99	0.067303	0.000570852	0.0119125	24.468	2832.52
SMST112-032	0.935	0.0237	88556.9	0	25.5	0.959	4.13	23.62	3.84	91.35	179.48	316.58	523.1	840.83	1273.01	1712.89	1809.08	51586.5	0	<****	0	15.77	1.02	0.78	1846.21	16449.3	<****	0	<****	<****	<****		0.0826679	4995.29	0.0717591	0	0	54.209	4941.08
SMST112-033	0.935	0.0123	88987.4	0.306	20.63	0.703	2.62	22.54	6.03	73.03	137.71	258.94	426.16	677.33	1024.77	1328.84	1371.4	51495.3	0	<****	0	15.74	1.02	0.61	1412.64	16352.8	<****	0	<****	<****	<****		0.148624	3979.61	0.0712648	0.000230276	0.00419006	46.799	3932.81
																																						0	0
Element	Si29	Ti49	Zr91	La139	Ce140	Pr141	Nd146	Sm147	Eu153	Gd157	Tb159	Dy163	Ho165	Er167	Tm169	Yb172	Lu175	Hf178	Hg202	Hg201	Pb204	Pb206	Pb207	Pb208	Th232	U238	Pm147	Hg204	Po208	U232	Pu238		Eu/Eu*	total REE	Gd/Yb	La/Lu	La/Gd	0	0
4SMST778-001	0.935	0	87233.5	0.22	27.13	2.67	10.06	67.83	11.32	270.32	528.69	1024.59	1609.35	2343.85	3280.88	4089.72	3892.63	43882.3	0	<****	0	39.35	2.58	1.58	4000.95	41176	<****	0	<****	<****	<****		0.0835981	13266.6	0.0823925	5.37934e-05	0.00081385	107.91	13158.7
4SMST778-002	0.935	0.0139	89884.2	0.082	14.6	0.712	2.71	17.57	5	61.32	113.79	217.2	372.69	586.8	895.05	1278.81	1364.12	55831.7	0	<****	0	17.61	1.18	0.66	1601.9	18844.3	<****	0	<****	<****	<****		0.152329	3566.33	0.0685101	6.41221e-05	0.00133725	35.674	3530.66
4SMST778-007	0.935	0.0263	88197.6	0.086	13.7	4.64	15.3	66.77	24.43	197.53	370.46	642.25	1024.99	1594.97	2224.06	3039.42	3127.79	46052.7	0	<****	0	23.87	1.55	1.4	3518.99	25351.6	<****	0	<****	<****	<****		0.212724	9218.61	0.088815	2.82949e-05	0.000435377	100.496	9118.11
4SMST778-008	0.935	0.0094	87217.7	0.074	15.59	0.313	3.02	25.55	11.61	96.35	185.04	383.95	665.82	1079.44	1749.59	2347.34	2171.61	69232.4	0	<****	0	43.58	2.85	1.12	2726.87	46870.1	<****	0	<****	<****	<****		0.233997	6563.69	0.05507	3.1525e-05	0.000768033	44.547	6519.14
4SMST778-009	0.935	0.0114	88872.8	7.28	25.84	7.62	9.05	33.99	4.81	116.33	221.11	420.39	684.72	1014.93	1506.81	1991.53	2060.08	52476.6	0	<****	0	15.88	1.14	0.84	1803.95	16622.1	<****	0	<****	<****	<****		0.0764933	6044.41	0.0772028	0.00365548	0.0625806	83.78	5960.63
4SMST778-012	0.935	0.0164	83424	0.962	25.84	7.56	18.48	72.52	34.27	241.59	412.07	741.56	1109.37	1653.79	2274.35	2841.5	2748.32	37562.8	0	<****	0	19.12	1.64	1.58	2880.72	19645.9	<****	0	<****	<****	<****		0.258908	9433.86	0.106224	0.000338554	0.00398195	125.362	9308.5
4SMST778-013	0.935	0.0045	85026.3	0.512	24.63	3.14	11.69	67.11	20.16	226.56	382.67	672.89	1033.68	1489.21	2061.9	2669.53	2616.28	42501.8	0	<****	0	17.6	1.16	0.94	2223.19	18022	<****	0	<****	<****	<****		0.163495	8663.68	0.109879	0.000191794	0.00225989	107.082	8556.6
4SMST778-014	0.935	0.007	85185	0	15.3	0.515	2.44	17.36	4.71	60.22	113.83	215.12	356.94	553.99	859.23	1198.74	1233.06	46181.6	0	<****	0	11.65	0.77	0.41	948.97	12095.9	<****	0	<****	<****	<****		0.145672	3398.39	0.070086	0	0	35.615	3362.78
4SMST778-017	0.935	0.0174	83849	0.309	44.29	2.46	8.79	44.12	11.63	155.89	266.52	499.46	778.17	1163.09	1749.7	2281.96	2250.69	44340	0	<****	0	24.06	1.6	1.38	3180.68	24657.3	<****	0	<****	<****	<****		0.140234	7006.39	0.0890953	0.00013541	0.00198217	99.969	6906.42
4SMST778-019	0.935	0.46	80683.8	2.66	30.82	6.55	15.01	67.95	21.23	227.73	407.88	751.68	1159.51	1705.35	2422.44	3126.68	3012.91	34976	0	<****	0	21.69	1.46	1.13	2707.2	23261.6	<****	0	<****	<****	<****		0.170665	9945.49	0.0940085	0.000850743	0.0116805	122.99	9822.5
4SMST778-020	0.935	0.034	81255.3	20.03	59.55	39.95	31.52	93.11	51.71	179.7	335.85	686.16	967.42	1496.07	2241.58	3112.12	3057.39	45052.5	0	<****	0	24.45	2	1.77	7855.28	37585.5	<****	0	<****	<****	<****		0.399763	9314.77	0.0801667	0.00643613	0.111464	244.16	9070.61
4SMST778-021	0.935	0.0049	85070.1	0	14.94	0.531	2.21	13.95	4.55	61.94	121.02	236.56	361.38	577.7	881.88	1208.73	1240.41	45806	0	<****	0	11.27	0.75	0.43	959.44	11497.1	<****	0	<****	<****	<****		0.154789	3485.39	0.0702363	0	0	31.631	3453.76
4SMST778-022	0.935	0.0193	84649.2	0	19	2.77	9.1	38.18	5.86	114.39	186.6	316.87	452.5	656.29	959.04	1324.6	1347.56	41267.5	0	<****	0	6.23	0.431	0.35	822.31	6688.56	<****	0	<****	<****	<****		0.0886718	4085.2	0.119276	0	0	69.05	4016.15
4SMST778-023	0.935	0.046	85946	3.27	32.43	8.05	13.85	34.9	19.7	103.65	196.38	375.95	511.24	841.75	1241.03	1756.06	1738.35	47601.8	0	<****	0	25.63	1.78	1.36	5578.79	30813	<****	0	<****	<****	<****		0.327543	5138.26	0.0835193	0.00186212	0.0315485	92.5	5045.76
4SMST778-025	0.935	0.0217	87123.9	7.66	18.99	8.07	20.16	43.64	9.24	113.02	202.83	355.89	552.22	846.14	1239.54	1694.33	1806.97	42481.2	0	<****	0	16.57	1.1	0.72	1609.25	16836.9	<****	0	<****	<****	<****		0.131569	5111.73	0.091179	0.00452096	0.0677756	98.52	5013.21
4SMST778-027	0.935	0.0122	82191.4	0.323	23.91	4	10.22	42.17	16.86	115.62	187.61	328.89	497.35	758.87	1118.75	1497.31	1525.6	52811.1	0	<****	1.16	15.77	1.98	1.81	1992.56	15078.6	<****	0	<****	<****	<****		0.241457	4601.88	0.103347	0.00021572	0.00279363	80.623	4521.26
4SMST778-028	0.935	0.0165	83893	0.255	17.75	5.3	15.21	75.88	15.73	235.42	414.51	728.01	1144.39	1640.78	2378.71	3078.11	3115.02	42168.3	0	<****	0	23.44	1.75	1.41	2911.8	23940.7	<****	0	<****	<****	<****		0.117691	9750.06	0.0989696	8.2843e-05	0.00108317	114.395	9635.66
4SMST778-029	0.935	0.0264	82449.6	0	26.5	4.67	16.04	62.52	11.09	193.6	331.42	561.71	881.51	1280.6	1876.12	2469.61	2406.88	43804	0	<****	0	32.03	2.07	1.58	3697.86	34030	<****	0	<****	<****	<****		0.100802	7715.39	0.103192	0	0	109.73	7605.66
4SMST778-032	0.935	0.0133	87009.9	0	33.98	1.053	4.94	28.4	6.1	97.64	191.84	379.44	614.77	995.82	1502.04	1918.48	1978.17	52490.5	0	<****	0	36.12	2.32	1.37	3126.59	37071.3	<****	0	<****	<****	<****		0.11584	5774.5	0.0650049	0	0	68.373	5706.13
4SMST778-035	0.935	0.0152	87054.4	1.162	27.5	1.893	3.27	15.7	3.91	55.17	96.36	176.63	288.13	462.7	675.38	950.74	988.93	46707.8	0	<****	0	11.06	0.74	0.44	1044.15	10979.5	<****	0	<****	<****	<****		0.132854	2758.55	0.0816873	0.00122221	0.0210622	49.525	2709.02
																																						0	0
																																						0	0
																																						0	0
																																						0	0
																																						0	0
																																						0	0
																																						0	0
																																						0	0
																																						0	0
																																						0	0
																																						0	0
																																						0	0
																																						0	0
																																						0	0
																																						0	0
																																						0	0
																																						0	0
																																						0	0
																																						0	0
																																						0	0
																																						0	0
																																						0	0
																																						0	0
																																						0	0
																																						0	0
																																						0	0
																																						0	0
																																						0	0
																																						0	0
																																						0	0
																																						0	0
																																						0	0
																																						0	0
																																						0	0
																																						0	0
																																						0	0
																																						0	0
																																						0	0
																																						0	0
																																						0	0
																																						0	0
																																						0	0
																																						0	0
																																						0	0
																																						0	0
																																						0	0
																																						0	0
																																						0	0
																																						0	0
																																						0	0
																																						0	0
																																						0	0
																																						0	0
																																						0	0
																																						0	0
																																						0	0
																																						0	0
																																						0	0
																																						0	0
																																						0	0
																																						0	0
																																						0	0
																																						0	0
																																						0	0
																																						0	0
																																						0	0
																																						0	0
																																						0	0
																																						0	0
																																						0	0
																																						0	0
																																						0	0
																																						0	0
																																						0	0
																																						0	0
																																						0	0
																																						0	0
																																						0	0
																																						0	0
																																						0	0
																																						0	0
																																						0	0
																																						0	0
																																						0	0
																																						0	0
																																						0	0
																																						0	0
																																						0	0
																																						0	0
																																						0	0
																																						0	0
																																						0	0
																																						0	0
																																						0	0
																																						0	0
																																						0	0
																																						0	0
																																						0	0
																																						0	0
																																						0	0
																																						0	0
																																						0	0
																																						0	0
																																						0	0
																																						0	0
																																						0	0
																																						0	0
																																						0	0
																																						0	0
																																						0	0
																																						0	0
																																						0	0
																																						0	0
																																						0	0
																																						0	0
																																						0	0
																																						0	0
																																						0	0
																																						0	0
																																						0	0
																																						0	0
																																						0	0
																																						0	0
																																						0	0
																																						0	0
																																						0	0
																																						0	0
																																						0	0
																																						0	0
																																						0	0
																																						0	0
																																						0	0
																																						0	0
																																						0	0
																																						0	0
																																						0	0
																																						0	0
																																						0	0
																																						0	0
																																						0	0
																																						0	0
																																						0	0
																																						0	0
																																						0	0
																																						0	0
																																						0	0
																																						0	0
																																						0	0
																																						0	0
																																						0	0
																																						0	0
																																						0	0
																																						0	0
																																						0	0
																																						0	0
																																						0	0
																																						0	0
																																						0	0
																																						0	0
																																						0	0
																																						0	0
																																						0	0
																																						0	0
																																						0	0
																																						0	0
																																						0	0
																																						0	0
																																						0	0
																																						0	0
																																						0	0
																																						0	0
																																						0	0
																																						0	0
																																						0	0
																																						0	0
																																						0	0
																																						0	0
																																						0	0
																																						0	0
																																						0	0
																																						0	0
																																						0	0
																																						0	0
																																						0	0
																																						0	0
																																						0	0
																																						0	0
																																						0	0
																																						0	0
																																						0	0
																																						0	0
																																						0	0
																																						0	0
																																						0	0
																																						0	0
																																						0	0
																																						0	0
																																						0	0
																																						0	0
																																						0	0
																																						0	0
																																						0	0
																																						0	0
																																						0	0
																																						0	0
																																						0	0
																																						0	0
																																						0	0
																																						0	0
																																						0	0
																																						0	0
																																						0	0
